1 **Macrophage-derived insulin/IGF antagonist Impl2 regulates systemic metabolism for**  
2 **mounting an effective acute immune response in *Drosophila***

3 Gabriela Krejčová<sup>1#</sup>, Adam Bajgar<sup>1##</sup>, Pavla Nedbalová<sup>1</sup>, Julie Kovářová<sup>2</sup>, Nick Kamps-Hughes<sup>3</sup>, Helena  
4 Zemanová<sup>1</sup>, Lukáš Strych<sup>1</sup>, Tomáš Doležal<sup>1\*</sup>

5 <sup>1</sup>University of South Bohemia, Czech Republic, <sup>2</sup>Biology Centre CAS, Czech Republic, <sup>3</sup>University of Oregon,  
6 United States

7 <sup>#</sup>equal contribution

8 \*For correspondence: AB - bajgaa00@prf.jcu.cz TD - tomas.dolezal@prf.jcu.cz

9

10 **Abstract**

11 In response to invading pathogens, macrophages metabolically polarize towards Hif1 $\alpha$ -induced  
12 aerobic glycolysis, requiring increased supply of nutrients. Here, we show that in order to obtain  
13 sufficient resources, *Drosophila* macrophages release the insulin/IGF antagonist Impl2, whose  
14 expression is regulated by Hif1 $\alpha$ . Impl2 remotely induces the release of lipids and carbohydrates  
15 from adipose tissue by reducing insulin signaling, followed by increased nutrient accumulation in  
16 activated immune cells. Impl2 thus translates the metabolic requirements of immune cells into a  
17 systemic metabolic switch. Although these Impl2 effects are essential during the acute immune  
18 response to streptococcal infection, they become maladaptive upon chronic infection by an  
19 intracellular pathogen. The relevance of our model to mammalian immunometabolism is  
20 demonstrated by the increased expression of the Impl2 homolog IGFBP7 in human macrophages  
21 exposed to *Streptococcus*.

22 **Keywords:**

23 macrophage, immuno-metabolism, *Drosophila*, immunity, bacterial infection, *Streptococcus*, Impl2,  
24 IGFBP7, energy mobilization, Hif1 $\alpha$ , aerobic glycolysis, macrophage polarization, insulin resistance,

25 selfish immune system, adipose tissue remodeling, Foxo, infection-induced insulin resistance,  
26 Listeria, Insulin/IGF antagonist, wasting, cachexia

27

## 28 **Introduction**

29 Macrophages represent the front line of defence against invading pathogens. Although the  
30 effectiveness of the immune response correlates with the number of immune cells (Nicholson and  
31 Nicholson 2008), their maintenance requires energy and their excessive activation can lead to a  
32 myriad of pathologies and metabolic disorders (Shattuck-Heidorn et al. 2016; Zmora et al. 2017).

33 Animals have therefore evolved a strategy that allows them to maintain sufficient numbers of  
34 quiescent immune cells that can be rapidly activated in response to the detection of pathogen- or  
35 danger-associated molecular patterns (Kelly and O'Neill 2015). Numerous populations of sentinel  
36 macrophages wait for activating stimuli without presenting a substantial energy burden. As a  
37 consequence, macrophages depend on rapid and sufficient supply from external sources, making the  
38 acute phase of the immune response challenging for the whole organism (Newsholme et al. 1986).

39 In response to the recognition of an invading pathogen, macrophages must rapidly alter their  
40 metabolism to generate enough energy and precursors to support their bactericidal function.

41 Bactericidal (M1) macrophages therefore substantially increase the rate of glycolysis and the pentose  
42 phosphate pathway and rewire their mitochondrial metabolism in a Hif1 $\alpha$ -dependent manner (Van  
43 den Bossche, O'Neill, and Menon 2017). Such a metabolic setup resembles the Warburg effect, which  
44 was originally described as a unique metabolic program for cancer cells (Warburg 1925). We have  
45 recently shown that the metabolic polarization of macrophages is an ancient and evolutionarily  
46 conserved process, as *Drosophila* macrophages also undergo a Hif1 $\alpha$ -triggered metabolic switch that  
47 is essential for their bactericidal function (Krejčová et al. 2019).

48 An adverse aspect of M1 polarization is that these cells require more energy and become functionally  
49 dependent on external sources of glucose, glutamine, and lipids. Therefore, macrophages release

50 signals in response to their metabolic activation that regulate systemic metabolism, thus securing  
51 nutrient supply at the expense of other organs (Straub 2014). Such privileged behavior, in which  
52 macrophages usurp nutrients from other processes, is crucial for an effective immune response  
53 (Bajgar and Dolezal 2018). One factor, mediating such behavior, is extracellular adenosine, which  
54 links the current metabolic state of activated immune cells to the systemic mobilization of  
55 carbohydrates that serve as a resource for immune defense (Bajgar et al. 2015; Bajgar and Dolezal  
56 2018). However, this response is very complex and we assume the existence of other signaling  
57 factors with an analogous function.

58 To discover other signaling factors that are released by activated immune cells and regulate systemic  
59 metabolism, we sought inspiration from neoplastic tumor research. This idea is based on the notion  
60 that tumors and activated immune cells share common features of their cellular metabolism, as both  
61 utilize aerobic glycolysis triggered by Hif1 $\alpha$  (Biswas and Mantovani 2012; Nagao et al. 2019). They  
62 also share an impact on systemic metabolism, as both cancer and sepsis patients exhibit a phenotype  
63 similar to the wasting caused by cytokine-induced insulin resistance (Dev, Bruera, and Dalal 2018).  
64 Although insulin resistance is mostly studied as a pathological condition, its evolutionary  
65 conservation indicates that it must carry an adaptive physiological function (Soeters and Soeters  
66 2012; Odegaard and Chawla 2013). We therefore hypothesized that activated immune cells could  
67 release the same factors as tumor cells, but with a beneficial role for the acute response as opposed  
68 to cancer-induced cachexia.

69 In this study, we focus on the insulin/IGF antagonist ImpL2 (Imaginal morphogenesis protein-Late 2),  
70 which is released by neoplastic tumor cells, to suppress insulin signaling via binding to *Drosophila*  
71 insulin-like peptides, thereby causing energy wasting (Alee 2011; Arquier et al. 2006; Honegger et al.  
72 2008; Kwon et al. 2015; Figueroa-Clarevega and Bilder 2015). In addition to its production by  
73 neoplastic tumors, ImpL2 is known to be released by lipid-overloaded macrophages (Morgantini et al.  
74 2019), as well as by other cells employing Hif1 $\alpha$  activity-dependent metabolic programs in *Drosophila*  
75 (Alee 2011; Owusu-Ansah, Song, and Perrimon 2013; Kwon et al. 2015; Figueroa-Clarevega and Bilder

76 2015). We therefore decided to test the role of Impl2 as a macrophage-derived signaling factor that  
77 may be responsible for nutrient mobilization during the acute phase of immune response to bacterial  
78 infection.

79 Here we show that activated macrophages produce Impl2 in a Hif1-dependent manner during the  
80 acute phase of infection, resulting in Foxo-mediated changes in adipose tissue metabolism. As an  
81 outcome of Impl2 action, we observed increased titers of circulating carbohydrates and lipids and  
82 their accumulation in macrophages. Impl2 release by macrophages is necessary for resistance to  
83 streptococcal infection. In contrast to this beneficial role in fighting extracellular pathogens, the  
84 effects of Impl2 are maladaptive in response to intracellularly growing *Listeria*. Conservation of  
85 Impl2 function between insects and mammals is indicated by increased expression of the Impl2  
86 homolog IGFBP7 in human macrophages exposed to streptococci.

87

## 88 **Results**

### 89 **Impl2 expression increases in immune-activated macrophages in a Hif1 $\alpha$ -dependent manner**

90 To test the potential role of Impl2 during infection, we first monitored its expression profile during  
91 the acute phase of *Streptococcus pneumoniae* infection. Impl2 expression increased significantly in  
92 infected flies compared to PBS-injected controls, as early as 3 hours post-infection (hpi), reaching up  
93 to a threefold increase in expression 21 hpi on an organismal level (Figure 1A). To identify the tissues  
94 responsible for the infection-induced rise in Impl2 expression, we employed the Gal4 driver specific  
95 for the *Impl2-RA* transcriptional variant (Bader et al. 2013) to drive expression of the fluorescent  
96 marker UAS-mCherry. The pattern of Impl2-positive cells resembled the characteristic distribution of  
97 hemocytes in adult flies (Figure 1B), and their number increased substantially upon infection (Figure  
98 1B and C). The Impl2-RA>mCherry marker clearly colocalized with hemocyte-specific antibody  
99 against the scavenger receptor Nimrod C1 (NimC1; Figure 1D). To verify that cells expressing Impl2-  
100 RA>mCherry are macrophages, we injected flies with the phagocytic marker *S. aureus*-pHrodo-Green,



101 and it indeed colocalized with these cells (Figure 1-figure supplement 1). Cells expressing *Impl2-*  
102 *RA>mCherry* also actively recognized and engulfed *S. pneumoniae ex vivo* (Figure 1E). The evidence  
103 that *Impl2* is produced by macrophages during infection is further supported by the more than  
104 sixfold increase in expression in *CrqGal4>UAS-GFP* labeled (Clark et al. 2011) FACS sorted  
105 macrophages (Figure 1F).

106 As there are three alternative transcriptional start sites for *Impl2* (Figure 1I), we analyzed the  
107 expression pattern of each isoform at 24 hpi. Among all analyzed isoforms, the expression of *Impl2-*  
108 *RA* was the highest of all transcriptional variants in macrophages and was hardly detectable in fat  
109 body or muscles (Figure 1-figure supplement 2). While the *Impl2-RB+D* forms were the most  
110 abundant variants in adipose tissue, their expression was five times weaker than *Impl2-RA*  
111 expression in macrophages (see different y-axis scales in Figure 1-figure supplement 2). In addition,  
112 expression of the *Impl2-RA* isoform increased more than sixfold in macrophages, the most significant  
113 increase in expression of the transcripts in response to infection (Figure 1F and Figure 1-figure  
114 supplement 2). Thus, the *Impl2-RA* transcriptional variant expressed in macrophages contributes  
115 significantly to the overall increase in *Impl2* expression observed at the onset of infection.

116 The metabolic switch in activated macrophages is regulated by the transcription factor *Hif1 $\alpha$*   
117 (Krejčová et al. 2019), which is known to be a potent regulator of *Impl2* expression in cells, which  
118 rely on anaerobic metabolism (Allee 2011; Li et al. 2013; Owusu-Ansah, Song, and Perrimon 2013).  
119 We therefore hypothesized that this same regulation could underlie the infection-induced increase in  
120 *Impl2* in activated macrophages. Macrophage-specific knockdown of *Hif1 $\alpha$*  (for efficiency, see Figure  
121 1-figure supplement 3) resulted in the inability of these cells to trigger the characteristic infection-  
122 induced expression of *Impl2*, and this effect was particularly evident for the *Impl2-RA* isoform  
123 (Figure 1G). We identified a cluster of four *Hif1 $\alpha$*  binding sites upstream of the transcription start site  
124 of *Impl2-RA* (Figure 1I). Moreover, this enhancer region shows the strongest hypoxic induction of all  
125 sequence surrounding the *Impl2* gene (Kamps-Hughes et al. 2015 and Figure 1I), suggesting that  
126 *Hif1 $\alpha$*  may directly drive *Impl2-RA* transcription in macrophages. In-depth analysis of this 500bp

127 region revealed the presence of eight immune and stress response elements clustered together (four  
128 hypoxia response elements, two Relish bindings sites, and two heat shock factor binding sites; Figure  
129 1I and Figure 1-figure supplement 4). Chip-qPCR analysis revealed direct binding of Hif1 $\alpha$  to this part  
130 of the *Impl2-RA* promoter, and this interaction was further enhanced after infection (in Figure 1H  
131 denoted as region 5).

132 These experiments identified activated macrophages as prominent producers of Impl2 in infected  
133 adult flies. The increase of Impl2 production was associated with a Hif1 $\alpha$ -induced metabolic switch  
134 in macrophages, through direct binding of Hif1 $\alpha$  to the regulatory sequence of the *Impl2-RA* isoform.

135

### 136 **Macrophage-derived Impl2 is required for Foxo-mediated mobilization of fat body reserves**

137 Activated macrophages release signaling factors that mobilize reserves to provide sufficient nutrients  
138 for the activated immune system (Bajgar and Dolezal 2018; Dolezal et al. 2019). Here we show that  
139 macrophages increase Impl2 production during infection. As Impl2 has previously been associated  
140 with reserve mobilization, leading to wasting in flies with experimentally induced neoplastic growth,  
141 we further tested the impact of macrophage-derived Impl2 on systemic metabolism. To do so we  
142 employed *Drosophila* genetic tools to manipulate Impl2 expression specifically in macrophages  
143 (*Crq*>Gal4) or specifically in macrophages temporally restricted to the adult stage (*Hml*>Gal4,  
144 Gal80<sup>T5</sup>). Using conventional Impl2 knockdown (*Impl2*<sup>RNAi</sup>) and overexpression (*Impl2*<sup>CDS</sup>) constructs,  
145 we achieved significant changes in Impl2 expression (Figure 1F). These experimental manipulations  
146 allowed us to either prevent infection-induced upregulation of Impl2 in macrophages or to simulate  
147 the increase in Impl2 expression in uninfected individuals (Figure 1F).

148 Both infection and overexpression of Impl2 in macrophages significantly reduced triglyceride content  
149 in whole flies (Figure 2A), which was accompanied by dramatic changes in adipose tissue morphology  
150 (Figure 2B-E). The number of lipid droplets increased as their average size decreased (Figure 2B, C,  
151 and E), making the lipids more accessible for lipases. The overall area of adipose tissue occupied by

152 lipid droplets was markedly smaller (Figure 2D). It should be emphasized that these infection-induced  
153 effects were suppressed by macrophage-specific Impl2 knockdown (Figure 2A-E). Detailed lipidomic  
154 analysis of adipose tissue by mass spectrometry revealed that both infection and macrophage-  
155 specific overexpression of Impl2 caused a proportional shift in lipid content from storage lipids  
156 (triglycerides) to polar lipid species (phosphatidylethanolamine, phosphatidylinositol), which  
157 participate in lipid mobilization and transport (Figure 2F). These effects were reduced by Impl2  
158 knockdown (Figure 2F). Similar effects were also observed for glycogen stores as both infection and  
159 overexpression of Impl2 significantly reduced glycogen content in whole flies, while knockdown of  
160 Impl2 abolished this effect (Figure 2G). This data thus indicate that macrophage-derived Impl2 may  
161 serve as a mediator of cross-talk between the immune system and lipid metabolism in the adipose  
162 tissue.

163 In addition to a substantially increased lipolytic and glycogenolytic programs, we also observed  
164 enhanced autophagy in the adipose tissue of infected flies bearing the Atg8a-mCherry reporter  
165 (Figure 3A), further implying an increase in catabolic metabolism. These infection-induced metabolic  
166 changes are consistent with the expression of many metabolic genes in adipose tissue. The  
167 expression of *MTP*, *apoLPP*, *apoLTP*, and *Bmm* genes associated with lipid mobilization, as well as  
168 *Atg1* and *Atg6* genes associated with autophagy, were upregulated in adipose tissue during infection  
169 (Figure 3B and Figure 3-figure supplement 1). Furthermore, their expression is under the control of  
170 macrophage-derived Impl2. Indeed, knockdown of Impl2 suppressed this effect, whereas  
171 overexpression of Impl2 mimicked the response induced by infection (Figure 3B and Figure 3-figure  
172 supplement 1).

173 Many of the aforementioned metabolic genes whose expression is altered by Impl2 during infection  
174 (Figure 3B) are known Foxo targets, therefore we analyzed the impact of macrophage-derived Impl2  
175 on the subcellular localization of Foxo in adipose tissue. We found that Foxo displays nuclear  
176 localization upon infection, whereas it remained predominantly in the cytoplasm of adipocytes in  
177 uninfected flies (Figure 4). Macrophage-specific overexpression of Impl2 recapitulated the infection-

178 induced effect on Foxo nuclear localization, and conversely, knockdown of Impl2 reversed this effect  
179 (Figure 4). These effects of Impl2 on Foxo localization are in agreement with the expression of Foxo  
180 target genes (Figure 3B and Figure 3-figure supplement 1). To verify that the observed effects of  
181 macrophage-derived Impl2 on the fat body are indeed mediated by Foxo, we tried to rescue the  
182 effect of Impl2 overexpression in hemocytes by hypomorphic mutation of *Foxo*. The lipid droplet  
183 phenotype induced by Impl2 overexpression was completely reversed by the heterozygous  
184 *foxo*<sup>B<sup>GO</sup>1018</sup> mutation (Figure 5A), demonstrating that the effects of macrophage-derived Impl2 on fat  
185 body metabolism are indeed mediated by Foxo.

186 Impl2 is known to antagonize insulin signaling by binding to *Drosophila* insulin-like peptides  
187 (Honegger et al. 2008), which is here supported by effects on Foxo in the fat body, a known target of  
188 insulin signaling. Therefore, we tried to check the state of insulin signaling in the fat body by the  
189 commonly used PI3K reporter tGPH and phosphorylation of Akt. In response to infection, the tGPH  
190 reporter showed increased cytosolic localization in comparison to control flies when analyzed by  
191 confocal microscopy (Figure 5B). This effect was phenocopied by overexpression of Impl2 in  
192 macrophages even in the absence of infection (Figure 5B), demonstrating the ability of macrophage-  
193 derived Impl2 to antagonize insulin signaling in the fat body. Unfortunately, the effect of infection  
194 on tGPH localization was not strong enough to clearly see a difference after knocking down Impl2 in a  
195 double-blind evaluation. pAkt also appeared to be too variable during *S. pneumoniae* infection,  
196 precluding the reasonable use of Akt phosphorylation in our model.

197

## 198 **Macrophage-derived Impl2 increases lipids and carbohydrates both in circulation and in** 199 **macrophages**

200 Stimulated glycogen and triglyceride catabolism is manifested by hyperglycemia and hyperlipidemia  
201 in the circulation of infected flies. Elevated titers of glucose, trehalose, glycerides and free fatty acids  
202 were detected in the hemolymph of these flies (Figure 6A and Figure6-figure supplement 1).

203 Increased levels of circulating lipids and carbohydrates were accompanied by increased accumulation  
204 of these energy-rich compounds in infection-activated macrophages (Figure 6B). These results are  
205 supported by the higher occurrence of lipid droplets in the cytosol of infection-activated  
206 macrophages after staining with the neutral lipid dye OilRedO (Figure 6C and D). The ability of  
207 macrophages to uptake mobilized lipids was verified by injection of fluorescently labeled lipoproteins  
208 (LDL-pHrodo; Figure 6E and F). These lipoproteins can be endocytosed via recognition by the  
209 scavenger receptor Croquemort (fly homolog of mammalian CD36), which is abundantly expressed in  
210 *Drosophila* macrophages. Injection of different concentrations of LDL-pHrodo showed that  
211 lipoprotein uptake by macrophages correlates with the amount of lipoproteins in the circulation,  
212 even beyond the physiological concentrations commonly occurring in the hemolymph (Gilbert and  
213 Chino 1974). Reserve mobilization, which leads to an increase in circulating nutrients and their  
214 subsequent accumulation in activated macrophages, depends on the production of Impl2 by  
215 macrophages. Indeed, knockdown of macrophage-specific Impl2 suppresses all observed effects  
216 stimulated by infection, whereas overexpression of Impl2 mimicked these effects even in uninfected  
217 individuals (Figure 6A-D).

218 Taken together, the above results suggest that Impl2 produced by macrophages during infection  
219 affects insulin signaling in adipose tissue, thereby triggering a Foxo-mediated transcriptional program  
220 that provides macrophages with the nutrients they require.

221

## 222 **Impl2 is required for an effective immune response but can be detrimental during chronic** 223 **infection**

224 The efficiency of the immune response depends on an adequate supply of energy and essential  
225 precursors to activated immune cells. Therefore, we decided to investigate whether Impl2-mediated  
226 release of reserves is necessary for an effective immune response. Lack of Impl2 production by  
227 macrophages significantly reduced survival of flies infected with *S. pneumoniae* (Figure 7A and Figure

228 7-figure supplement 1). This infection is associated with elevated pathogen load (Figure 7B),  
229 indicating decreased resistance in these individuals. Elimination of bacteria and survival of *S.*  
230 *pneumonia* infection is critically dependent on efficient phagocytosis, otherwise flies succumb to  
231 infection within two days (Bajgar and Dolezal 2018). Indeed, reduced resistance in flies with knocked-  
232 down ImpL2 is associated with reduced phagocytic rates (Figure 7E and F). Infection-induced  
233 increases in antimicrobial peptide production by macrophages were reduced by ImpL2 knockdown  
234 for two of the three peptides analyzed (Figure 7-figure supplement 2). On the other hand,  
235 overexpression of ImpL2 24 hours prior to infection improved resistance to streptococcal infection,  
236 as evidenced by lower pathogen load and improved survival (Figure 6C and D). However, we did not  
237 detect a difference in phagocytosis and expression of the two antimicrobial peptides during infection  
238 is rather reduced in flies overexpressing ImpL2 (Figure 7-figure supplement 2), leaving the reasons for  
239 improved survival unclear.

240 Although our results demonstrate a beneficial role of ImpL2 during the acute phase of infection,  
241 ImpL2 has previously been associated with detrimental effects via induction of chronic cachexia-like  
242 wasting in a model of neoplastic tumor in *Drosophila* (Kwon et al. 2015). This suggests that the  
243 beneficial role of ImpL2 may be restricted to the short period of the acute phase of the immune  
244 response. Therefore, we tested the effects of ImpL2 manipulations in flies challenged with chronic  
245 infection caused by the intracellular pathogen *Listeria monocytogenes*. Flies injected with *Listeria* are  
246 unable to eliminate these bacteria and the length of their survival is determined by disease  
247 tolerance (Louie et al. 2016) whereas virulence and intracellular growth of *Listeria* depend on the  
248 availability of nutrients in the cytosol of the host cell (Chen, Pensinger, and Sauer 2017).  
249 Concordantly, the overexpression of ImpL2, which led to increased nutrient supplementation in  
250 immune cells, resulted in chronically increased *Listeria* burden (Figure 8A and B). This indicates that  
251 the originally beneficial effects of ImpL2 observed during the acute response to streptococcal  
252 infection may become detrimental during chronic immune challenge. Consistent with this, silencing  
253 of ImpL2 production by macrophage significantly reduced the intracellular load of *L. monocytogenes*

254 at both 24 hpi and 12 days post-infection (Figure 8C and D), which may be explained by either a  
255 decreased ability of macrophages to engulf *Listeria* or a reduction of nutrients in their cytosol.

256 In conclusion, Impl2-mediated resource mobilization is essential for an adequate antibacterial  
257 immune response and resistance to infection. On the other hand, chronic or excessive production of  
258 Impl2 tends to intensify the deleterious effects of chronic intracellular infections.

259

### 260 **Expression of *IGFBP7*, a mammalian homolog of Impl2, is upregulated in immune-activated THP-1** 261 **cells**

262 It has previously been shown that IGFBP7, the mammalian homologue of Impl2, is produced by lipid-  
263 loaded liver macrophages in obese mice and human patients, with consequent effects on systemic  
264 metabolism through the regulation of insulin signaling in hepatocytes. Impl2 released from lipid-  
265 loaded macrophages appears to play an analogous role in *Drosophila* fed a high-fat diet (Morgantini  
266 et al. 2019). To test the potential importance of the role of IGFBP7 in humans during infection, we  
267 measured the expression of IGFBPs in the PMA-activated THP-1 human monocytic cell line 24 hours  
268 after exposure to *S. pneumoniae* bacteria (Figure 9A). Expression of several IGFBP family members,  
269 namely *IGFBP1*, *IGFBP2*, *IGFBP5*, and *IGFBP6*, was not detected, indicating that these genes are not  
270 abundantly expressed in these cells (data not shown). Interestingly, *IGFBP7* gene expression was  
271 significantly increased in inoculated culture compared to PBS-treated controls (Figure 9B). In  
272 addition, the expression of the *IGFBP3* gene, which inhibits insulin resistance (Mohanraj et al. 2013),  
273 was reduced fourfold in activated THP-1 cells (Figure 9B), which is in agreement with the expected  
274 pattern associated with the adoption of bactericidal polarization by mammalian macrophages. This  
275 data therefore suggest that the increase in Impl2 / IGFBP7 production by macrophages in response  
276 to infection is evolutionarily conserved in mammals.

277

### 278 **Discussion**

279 In this work, we show that infection-induced Hif1 $\alpha$  transcriptional activity connects an intracellular  
280 metabolic switch to Impl2 production in activated macrophages (Figure 10). Impl2 subsequently  
281 induces the mobilization of resources from adipose tissue into the circulation, which may then  
282 become available to activated immune cells. This metabolic rearrangement of adipose tissue is most  
283 likely mediated by suppression of insulin signaling and subsequent transcriptional activity of Foxo.  
284 Such a program results in accelerated lipolysis and carbohydrate mobilization and the increased titer  
285 of circulating lipids and carbohydrates facilitates their utilization by macrophages. Although not  
286 directly tested in this work, these macromolecules are known to be important for bactericidal  
287 function of macrophages (Remmerie and Scott 2018). Indeed, here we show that such Impl2-  
288 induced metabolic adaptation is essential for the acute immune response, but becomes maladaptive  
289 in the case of infection by intracellular pathogens that metabolically exploit the host cell. This is a  
290 remarkable example of how a beneficial metabolic program can become maladaptive in chronic  
291 diseases. This mechanism may not be limited to insects, indicated by an experiment showing that  
292 human macrophages activated by the same bacteria increase the expression of IGFBP7, the human  
293 homolog of *Drosophila* Impl2.

294 We have previously shown that *Drosophila* macrophages undergo an evolutionarily conserved  
295 polarization to the M1 phenotype and thus their metabolism adjusts to Hif1 $\alpha$ -induced aerobic  
296 glycolysis in response to bacterial challenge. This cellular metabolic shift is accompanied by systemic  
297 metabolic changes necessary to supplement the sudden nutritional needs of macrophages (Krejčová  
298 et al. 2019). Coordination of cellular metabolism in macrophages with systemic metabolism is crucial  
299 for resistance to infection and implies the existence of circulating factors mediating this interorgan  
300 crosstalk (Dolezal et al. 2019). Inspired by research on neoplastic cancer cells (Kwon et al. 2015;  
301 Figueroa-Clarevega and Bilder 2015; Bunker et al. 2015), in this study we focus on the cachectic  
302 factor Impl2 as a candidate that has previously been linked to Hif1 $\alpha$  transcriptional activity while  
303 having the potential to regulate systemic metabolism (Alee 2011; Li et al. 2013). To test whether the  
304 link between Hif1 $\alpha$  activity and Impl2 expression during hypoxia also applies to infection-activated



305 macrophages, we performed a genomic *in silico* meta-analysis of hypoxic enhancer activity and Hif1 $\alpha$   
306 binding sites followed by Chip-qPCR to confirm the binding of Hif1 $\alpha$  to previously identified genomic  
307 loci (Kamps-Hughes et al. 2015). This approach revealed the induction of a hypoxic enhancer in close  
308 proximity to the transcription start site of the *ImpL2-RA* transcript variant, which is further supported  
309 by the presence of four hypoxia response elements at this locus. *ImpL2-RA* is the most strongly  
310 expressed transcriptional variant in macrophages and its expression is further increased after  
311 infection. This infection-induced increase is Hif1 $\alpha$  dependent, indicating a connection between *ImpL2*  
312 expression and an internal metabolic switch in infection-activated macrophages. We have previously  
313 identified extracellular adenosine as a systemic factor derived from immune cells, with an analogous  
314 function to *ImpL2*, mobilizing carbohydrate stores to be available to the immune system (Bajgar et al.  
315 2015; Bajgar and Dolezal 2018). While adenosine is a signaling molecule whose generation depends  
316 on the rate of cellular metabolism, the production of *ImpL2* protein is linked to the transcriptional  
317 activity of the central metabolic regulator Hif1 $\alpha$ . Thus, it is noteworthy that regulation of systemic  
318 metabolism can be mediated by factors with different mechanisms of production that reflect cellular  
319 metabolism of immune cells.

320 In addition to the regulation of carbohydrate metabolism, a prominent effect of *ImpL2* is its  
321 regulation of systemic lipid metabolism. The metabolic changes observed in infection-challenged flies  
322 resemble lipemia as a characteristic symptom of sepsis in severely ill patients (Harris, Gosnell, and  
323 Kumwenda 2000). In sepsis-induced lipemia, insulin-resistant hepatocytes elevate the level of  
324 circulating lipids, which are preferentially utilized by activated immune cells in the periphery  
325 (Khovidhunkit et al. 2004; Aspichueta et al. 2012). Scavenger receptor-mediated endocytosis of  
326 serum lipids together with attenuated reverse cholesterol transport contribute substantially to  
327 cholesterol accumulation in bactericidal immune cells (Podrez et al. 2000). A number of immune-  
328 related macrophage functions depend on sufficient delivery of lipids, ranging from phagocytosis and  
329 phagolysosome maturation, to catecholamine production and immune memory formation via the  
330 mevalonate pathway (summarized in Remmerie and Scott 2018). Although providing macrophages

331 with substantial amounts of lipids is essential for their proper function during the acute phase of  
332 infection, chronic exposure of macrophages to excessive lipids can lead to the adoption of a foam-  
333 cell phenotype, which promotes metabolic syndrome and atherosclerosis (Chistiakov et al. 2017;  
334 Febbraio, Guy, and Silverstein 2004).

335 Although we have not yet fully elucidate the mechanism of infection-induced lipid catabolism, we  
336 found that nuclear translocation of Foxo, followed by increased expression of several Foxo-target  
337 genes involved in this process, is regulated by macrophage-derived Impl2. Foxo-driven mobilization  
338 of lipid stores requires suppression of insulin signaling in adipose tissue (Molaei, Vandehoef, and  
339 Karpac 2019; Luong et al. 2006), which is in agreement with the well-documented ability of Impl2 to  
340 bind to *Drosophila* insulin-like peptides (DILPs) and thereby reduce insulin signaling in adipose tissue.  
341 This is further supported by our observations of reduced adipocyte insulin signaling in infected flies  
342 and flies with experimentally enhanced Impl2 production in macrophages (Alee 2011; Alic et al.  
343 2011; Arquier et al. 2006; Figueroa-Clarevega and Bilder 2015; Honegger et al. 2008; Kwon et al.  
344 2015; Okamoto et al. 2013). Metabolic adjustments and the switch from anabolism to catabolism in  
345 adipose tissue during infection are regulated by multiple mechanisms (reviewed in Dolezal et al.  
346 2019). Specifically, Foxo has previously been linked to wasting in flies during chronic infection  
347 (Dionne et al. 2006), suggesting its pathological effects during a prolonged immune response. In  
348 contrast, the remote effect of Impl2 on reserve mobilization described in this work represents a  
349 rather beneficial role for Impl2 during the acute immune response. Suppression of insulin signaling is  
350 often associated with chronic inflammation and can become detrimental to the organism by  
351 disrupting metabolic balance. However, the concept of selfish immunity (Straub 2014) considers  
352 insulin resistance as an evolutionary adaptive mechanism for rerouting nutrients toward the immune  
353 system during the acute immune response. Our results showing that Impl2 is required for an  
354 effective immune response through changes in lipid and carbohydrate metabolism can be considered  
355 as experimental evidence for insulin resistance as an adaptive mechanism for resource mobilization  
356 in the acute phase of the immune response.

357 Neoplastic tumors share a characteristic cellular metabolism (Warburg 1925) with bactericidal  
358 macrophages (Andrejeva and Rathmell 2017). We suggest that they also share the production of  
359 Impl2, which was originally perceived as a cancer-derived cachectic factor (Kwon et al. 2015;  
360 Figueroa-Clarevega and Bilder 2015), released from these cells to usurp energy from other tissues via  
361 cytokine-induced insulin resistance. The perception of Impl2 expression as a consequence of cellular  
362 metabolic settings is supported by other conditions when ATP generation is independent of  
363 mitochondria, such as experimentally induced mitochondrial dysfunction, hypoxia, and neoplastic  
364 tumor growth (Alee 2011; Figueroa-Clarevega and Bilder 2015; Kwon et al. 2015; Li et al. 2013).  
365 Although this mechanism of metabolic regulation is beneficial to the organism during acute infection,  
366 it becomes detrimental in the case of tumor growth or chronic infection. Elimination of *S. pneumonia*  
367 requires effective phagocytosis – the flies either clear the infection or die. When phagocytosis is  
368 blocked, flies succumb to infection within two days (Bajgar and Dolezal 2018), so this immune  
369 response can be regarded as acute. Impl2-mediated metabolic changes appear to be important for  
370 such a response. On the other hand, the harmful effect of Impl2 on the survival of infection caused  
371 by the intracellular pathogen *L. monocytogenes* is demonstrated here. The flies are unable to  
372 eliminate these bacteria, which escape from the phagosome and establish a chronic intracellular  
373 infection from which the flies sooner or later die. In this case, reducing phagocytosis by knocking  
374 down Impl2 lowered the short- and long-term intracellular load of the pathogen, leading to longer  
375 host survival. Various intracellular bacteria are known to take advantage of host cell supply and  
376 hijack their metabolic cascades to literally nourish themselves (Péan et al. 2017; Teng, Ang, and  
377 Guan 2017). We do not know whether the observed increased *L. monocytogenes* burden in flies  
378 overexpressing Impl2 is due to increased nutrients available to the pathogen, but these flies die  
379 more rapidly, indicating a rather negative role for Impl2 during chronic infection.

380 In this study, we revealed that human macrophages activated by *S. pneumoniae* upregulate the  
381 expression of IGFBP7, the human homolog of *Drosophila* Impl2, suggesting that a similar mechanism  
382 of metabolic regulation may operate in humans. Remarkably, not only infection but also

383 experimentally induced metabolic syndrome in both *Drosophila* and mammals led to increased  
384 ImpL2/IGFBP7 expression in macrophages (Morgantini et al. 2019). While ImpL2-producing  
385 macrophages affect metabolism in the *Drosophila* fat body, which integrates functions of both  
386 mammalian adipose tissue and liver, IGFBP7-producing Kupffer cells act directly on hepatocytes to  
387 induce systemic metabolic changes (Morgantini et al. 2019; Akiel et al. 2017). The ability of both  
388 ImpL2 and IGFBP7 to bind extracellular insulin, thereby reducing systemic insulin signaling, further  
389 documents their functional homology, suggesting that their mechanism of action may also be  
390 conserved (Honegger et al. 2008; Arquier et al. 2006; Oh et al. 1996). Although this mechanism of  
391 resource mobilization may be important for the acute phase response, when prolonged it contributes  
392 to the progression of metabolic syndrome and atherosclerosis in mammals (Tomkin 2012). It is  
393 therefore not surprising that circulating IGFBP7 levels are considered a marker of systemic metabolic  
394 imbalance accompanying several human diseases such as obesity, acute kidney injury, liver fibrosis,  
395 and chronic obstructive pulmonary disease (Liu et al. 2015; Gunnerson et al. 2016; Martínez-Castillo  
396 et al. 2020; Ruan et al. 2017).

397 Combining our data with previous work, we conclude that the insulin/IGF antagonist ImpL2, which is  
398 released from activated macrophages as a reflection of their metabolic polarization, mediates  
399 nutrient mobilization from adipose tissue by reducing insulin signaling to liberate sufficient resources  
400 for the activated immune system. Despite the fact that both ImpL2 and insulin resistance are mostly  
401 studied in the context of pathological conditions such as cancer-induced cachexia, obesity, and  
402 chronic inflammatory conditions, our data revealed that they may play a beneficial role in the acute  
403 phase of bacterial infection. The relevance of our model is further supported by the production of  
404 IGFBP7, a homologue of ImpL2, in response to streptococcal infection in human macrophages. This  
405 leads us to the hypothesis that analogous mechanisms may also apply to macrophage-induced  
406 nutrient mobilization from hepatocytes during the acute phase of the immune response; however,  
407 this relationship remains to be experimentally verified.

408

409 **Funding**

410 Tomáš Doležal - Czech Science Foundation (Project 20-09103S)

411 Adam Bajgar - Czech Science Foundation (Project 20-14030S)

412 Gabriela Krejčová - USB Grant Agency (Project 050/2019/P)

413

414 **Acknowledgment**

415 The authors acknowledge funding from the Grant Agency of the Czech Republic to TD (Project 20-  
416 09103S; [www.gacr.cz](http://www.gacr.cz)) and to AB (Project 20-14030S; [www.gacr.cz](http://www.gacr.cz)). GK was supported by USB Grant  
417 Agency (Project 050/2019/P). We thank to Lucie Hrádková for laboratory services, enthusiasm and  
418 support, Alena Krejčí-Bruce and Lenka Chodáková for critical comments and inspiring discussions,  
419 Pavel Branný and Linda Doubravová for help with the preparation of the S.p.-GFP strain and Hana  
420 Sehadová for help with scanning electron microscopy. We thank to Hugo Stocker for the ImpL2<sup>RNAi</sup>,  
421 ImpL2<sup>CDS</sup>, and ImpL2-RA-Gal4 fly lines, Gabor Juhasz for the Atg8amCherry fly, and Marc Dionne for  
422 Crq>GFP fly line. Other fly stocks were obtained from the Bloomington Center (Bloomington, IN) and  
423 the VDRC (Vienna, Austria). The *S. pneumoniae* and *L. monocytogenes* bacterial strains were obtained  
424 from Dr. David Schneider. We also thank Martin Moss and Petr Šimek for the lipidomics service, the  
425 Department of Medical Biology (USB) for allowing us to use the S3eBioRad sorter, Biology Centre CAS  
426 for allowing us to use a confocal microscope, and a laboratory equipped to maintain human tissue  
427 cultures. We are also grateful to developers of Fiji: an open-source platform for biological-image  
428 analysis (doi:10.1038/nmeth.2019)

429

430 **Materials and methods**

431 ***Drosophila melanogaster* strains and culture**

432 The flies were raised on a diet containing cornmeal (80 g/l), sucrose (50 g/l), yeast (40 g/l), agar (10  
433 g/l), and 10%-methylparaben (16.7 mL/l) and maintained in a humidity-controlled environment with  
434 a natural 12 h/12 h light/dark cycle at 25°C. Flies carrying Gal80 protein were raised at 18°C and  
435 transferred to 29°C 24 h prior to infection in order to degrade temperature-sensitive Gal80. Prior to  
436 the experiments, flies were kept in plastic vials on a sucrose-free cornmeal diet (cornmeal 53.5 g/l,  
437 yeast 28.2 g/l, agar 6.2 g/l and 10%-methylparaben 16.7 mL/l) for 7 days. Flies infected with *S.*  
438 *pneumoniae* were kept on a sucrose-free cornmeal diet in incubators at 29°C due to the temperature  
439 sensitivity of *S. pneumoniae*. They were transferred to fresh vials every other day without the use of  
440 CO<sub>2</sub> to ensure good food condition. Flies infected with *L. monocytogenes* were kept on a sucrose-free  
441 cornmeal diet at 25°C. The Drosophila Stock Center in Bloomington provided *ImpL2<sup>RNAi</sup>* (*y1 sc\* v1*;  
442 *P{TRiP.HMCO3863}attP40*; FBst0055855) *TRiP<sup>control</sup>* (*y[1] v[1]* ; *P{y[+t7.7]=CaryP}attP40*; FBst0036304)  
443 and *20xUAS-6xmCherry* (*P{20XUAS-6XmCherry-HA}attP2*; FBtp0094992) flies. *ImpL2-RA-Gal4*  
444 (*FBal0290965*) and *UAS-ImpL2<sup>cds</sup>* (*UAS-s.ImpL2*; *FBal0249386*) were kind gifts from Hugo Stocker.  
445 *CrqGal4>2xeGFP* were obtained from Marc Dionne. The *Atg8a-mCherry* strain was kindly provided by  
446 Gabor Juhasz. The *w<sup>1118</sup>* strain has a genetic background based on *CantonS*.

447

## 448 Genotypes of experimental models

### 449 Figure 1

450 **ImpL2-RA>mCherry** corresponds to *w<sup>1118</sup>/w<sup>1118</sup>*; *20xUAS-6xmCherry/+*; *ImpL2-RA-Gal4/+*

451 **HmlGal4>GFP** refers to *w<sup>1118</sup>/w<sup>1118</sup>*; *HmlΔ-Gal4 UAS-2xeGFP/HmlΔ-Gal4 UAS-2xeGFP*; *+/+*

452 **HmlGal4>GFP; Hif1α<sup>RNAi</sup>** corresponds to *w<sup>1118</sup>/+*; *HmlΔ-Gal4 UAS-2xeGFP/+*; *UAS-Hif1α<sup>RNAi</sup>/+*

453 **ImpL2<sup>RNAi</sup>** refers to *w<sup>1118</sup>/+*; *HmlΔ-Gal4/ UAS-ImpL2<sup>RNAi</sup>*; *P{tubPGal80ts}/+*

454 **ImpL2<sup>cds</sup>** corresponds to *w<sup>1118</sup>/w<sup>1118</sup>*; *HmlΔ-Gal4/+*; *P{tubPGal80ts}/UAS-ImpL2<sup>cds</sup>*

455 **TRiP<sup>control</sup>** refers to  $w^{1118}/+; Hml\Delta-Gal4/+; P\{tubPGal80ts\}/TRiP^{control}$

456 **w<sup>1118</sup>** corresponds to  $w^{1118}/w^{1118}; Hml\Delta-Gal4/+; P\{tubPGal80ts\}/+$

457

458 **Figure 1-figure supplement 3**

459 **Hml>Gal4, UAS-GFP x TRiP<sup>control</sup>** corresponds to  $w^{1118}/+; Hml\Delta-Gal4 UAS-2xeGFP/+; TRiP^{control}/+$

460 **Hml>Gal4, UAS-GFP x Hif1 $\alpha$ <sup>RNAi</sup>** corresponds to  $w^{1118}/+; Hml\Delta-Gal4 UAS-2xeGFP/+; UAS-Hif1\alpha^{RNAi}/+$

461

462 **Figure 2**

463 **ImpL2<sup>RNAi</sup>** refers to  $w^{1118}/+; Hml\Delta-Gal4/ UAS-ImpL2^{RNAi}; P\{tubPGal80ts\}/+$

464 **ImpL2<sup>cds</sup>** corresponds to  $w^{1118}/w^{1118}; Hml\Delta-Gal4/+; P\{tubPGal80ts\}/UAS-ImpL2^{cds}$

465 **TRiP<sup>control</sup>** refers to  $w^{1118}/+; Hml\Delta-Gal4/+; P\{tubPGal80ts\}/TRiP^{control}$

466 **w<sup>1118</sup>** corresponds to  $w^{1118}/w^{1118}; Hml\Delta-Gal4/+; P\{tubPGal80ts\}/+$

467

468 **Figure 3**

469 **ImpL2<sup>RNAi</sup>** refers to  $w^{1118}/+; Hml\Delta-Gal4/ UAS-ImpL2^{RNAi}; P\{tubPGal80ts\}/+$

470 **ImpL2<sup>cds</sup>** corresponds to  $w^{1118}/w^{1118}; Hml\Delta-Gal4/+; P\{tubPGal80ts\}/UAS-ImpL2^{cds}$

471 **Atg8a-mCherry** refers to gen  $+/+; Atg8a-mCherry/Atg8a-mCherry$

472

473 **Figure 3-figure supplement 1**

474 **ImpL2<sup>RNAi</sup>** refers to  $w^{1118}/+; Hml\Delta-Gal4/ UAS-ImpL2^{RNAi}; P\{tubPGal80ts\}/+$

475 **ImpL2<sup>cds</sup>** corresponds to  $w^{1118}/w^{1118}; Hml\Delta-Gal4/+; P\{tubPGal80ts\}/UAS-ImpL2^{cds}$

476 **TRiP<sup>control</sup>** refers to  $w^{1118}/+; Hml\Delta-Gal4/+; P\{tubPGal80ts\}/TRiP^{control}$

477 **w<sup>1118</sup>** corresponds to  $w^{1118}/w^{1118}; Hml\Delta-Gal4/+; P\{tubPGal80ts\}/+$

478

#### 479 **Figure 4**

480 **ImpL2<sup>RNAi</sup>** refers to  $w^{1118}/+; Hml\Delta-Gal4/UAS-ImpL2^{RNAi}; P\{tubPGal80ts\}/+$

481 **ImpL2<sup>cds</sup>** corresponds to  $w^{1118}/w^{1118}; Hml\Delta-Gal4/+; P\{tubPGal80ts\}/UAS-ImpL2^{cds}$

482 **TRiP<sup>control</sup>** refers to  $w^{1118}/+; Hml\Delta-Gal4/+; P\{tubPGal80ts\}/TRiP^{control}$

483 **w<sup>1118</sup>** corresponds to  $w^{1118}/w^{1118}; Hml\Delta-Gal4/+; P\{tubPGal80ts\}/+$

484

#### 485 **Figure 5**

486 **Hml>Gal4 TubGal80 x w<sup>1118</sup>** corresponds to  $w^{1118}/w^{1118}; Hml\Delta-Gal4 P\{tubPGal80ts\}/+; +/+$

487 **Hml>Gal4 TubGal80 x ImpL2<sup>cds</sup>** corresponds to  $w^{1118}/w^{1118}; Hml\Delta-Gal4 P\{tubPGal80ts\}/+; UAS-$   
488  $ImpL2^{cd}/+$

489 **Hml>Gal4 TubGal80 x foxo<sup>BG01018</sup> ImpL2<sup>cds</sup>** refers to  $w^{1118}/w^{1118}; Hml\Delta-Gal4 P\{tubPGal80ts\}/+;$   
490  $P\{w[+mGT]=GT1\}foxo^{BG01018} UAS-ImpL2^{cds}/+$

491 **Hml>Gal4 TubGal80; tGPH-GFP x w<sup>1118</sup>** corresponds to  $w^{1118}/w^{1118}; Hml\Delta-Gal4 P\{tubPGal80ts\}/+;$   
492  $tGPH/+$

493 **Hml>Gal4 TubGal80; tGPH-GFP x ImpL2<sup>cds</sup>** corresponds to  $w^{1118}/w^{1118}; Hml\Delta-Gal4 P\{tubPGal80ts\}/+;$   
494  $tGPH/UAS-ImpL2^{cds}$

495

#### 496 **Figure 6**

497 **ImpL2<sup>RNAi</sup>** refers to  $w^{1118}/+; Hml\Delta-Gal4/UAS-ImpL2^{RNAi}; P\{tubPGal80ts\}/+$



- 498 **ImpL2<sup>cds</sup>** corresponds to  $w^{1118}/w^{1118}; Hml\Delta-Gal4/+; P\{tubPGal80ts\}/UAS-ImpL2^{cds}$
- 499 **TRiP<sup>control</sup>** refers to  $w^{1118}/+; Hml\Delta-Gal4/+; P\{tubPGal80ts\}/TRiP^{control}$
- 500 **w<sup>1118</sup>** corresponds to  $w^{1118}/w^{1118}; Hml\Delta-Gal4/+; P\{tubPGal80ts\}/+$
- 501 **Crq>Gal4; UAS2xGFP x ImpL2<sup>RNAi</sup>** refers to  $w^{1118}/+; UAS-ImpL2^{RNAi}/+; Crq-Gal4, UAS-2xeGFP/+$
- 502 **Crq>Gal4; UAS2xGFP x ImpL2<sup>cds</sup>** corresponds to  $w^{1118}/w^{1118}; +/+; Crq-Gal4, UAS-2xeGFP/UAS-$
- 503 *ImpL2<sup>cds</sup>*
- 504 **Crq>Gal4; UAS2xGFP x TRiP<sup>control</sup>** refers to  $w^{1118}/+; +/+; Crq-Gal4, UAS-2xeGFP/TRiP^{control}$
- 505 **Crq>Gal4; UAS2xGFP x W<sup>1118</sup>** corresponds to  $w^{1118}/w^{1118}; Crq-Gal4, UAS-2xeGFP/+$
- 506 **CrqGal4>GFP** refers to  $w^{1118}/w^{1118}; Crq-Gal4, UAS-2xeGFP/Crq-Gal4, UAS-2xeGFP$
- 507
- 508 **Figure 7**
- 509 **ImpL2<sup>RNAi</sup>** refers to  $w^{1118}/+; Hml\Delta-Gal4/ UAS-ImpL2^{RNAi}; P\{tubPGal80ts\}/+$
- 510 **ImpL2<sup>cds</sup>** corresponds to  $w^{1118}/w^{1118}; Hml\Delta-Gal4/+; P\{tubPGal80ts\}/UAS-ImpL2^{cds}$
- 511 **TRiP<sup>control</sup>** refers to  $w^{1118}/+; Hml\Delta-Gal4/+; P\{tubPGal80ts\}/TRiP^{control}$
- 512 **w<sup>1118</sup>** corresponds to  $w^{1118}/w^{1118}; Hml\Delta-Gal4/+; P\{tubPGal80ts\}/+$
- 513 **Crq>Gal4 x ImpL2<sup>cds</sup>** corresponds to  $w^{1118}/w^{1118}; +/+; Crq-Gal4, UAS-2xeGFP/UAS-ImpL2^{cds}$
- 514
- 515 **Figure 7-figure supplement 1**
- 516 **Hml-Gal4; TubGal80<sup>TS</sup>** refers to  $w^{1118}/w^{1118}; Hml\Delta-Gal4/+; P\{tubPGal80ts\}/+$
- 517 **Hml-Gal4; TubGal80<sup>TS</sup> > ImpL2<sup>cds</sup>** corresponds to  $w^{1118}/w^{1118}; Hml\Delta-Gal4/+; P\{tubPGal80ts\}/UAS-$
- 518 *ImpL2<sup>cds</sup>*

519 **ImpL2<sup>cds</sup> x w<sup>1118</sup>** corresponds to  $w^{1118}/w^{1118}; +/UAS-ImpL2^{cds}$

520 **Hml-Gal4; TubGal80<sup>TS</sup> > ImpL2<sup>RNAi</sup>** corresponds to  $w^{1118}/+; Hml\Delta-Gal4/ UAS-ImpL2^{RNAi};$

521  $P\{tubPGal80ts\}/+$

522 **ImpL2<sup>RNAi</sup>** corresponds to  $w^{1118}/+; +/ UAS-ImpL2^{RNAi}$

523

## 524 **Figure 7-figure supplement 2**

525 **ImpL2<sup>RNAi</sup>** refers to  $w^{1118}/+; Hml\Delta-Gal4/ UAS-ImpL2^{RNAi}; P\{tubPGal80ts\}/+$

526 **ImpL2<sup>cds</sup>** corresponds to  $w^{1118}/w^{1118}; Hml\Delta-Gal4/+; P\{tubPGal80ts\}/UAS-ImpL2^{cds}$

527 **TRiP<sup>control</sup>** refers to  $w^{1118}/+; Hml\Delta-Gal4/+; P\{tubPGal80ts\}/TRiP^{control}$

528 **w<sup>1118</sup>** corresponds to  $w^{1118}/w^{1118}; Hml\Delta-Gal4/+; P\{tubPGal80ts\}/+$

529

## 530 **Figure 8**

531 **ImpL2<sup>RNAi</sup>** refers to  $w^{1118}/+; Hml\Delta-Gal4/ UAS-ImpL2^{RNAi}; P\{tubPGal80ts\}/+$

532 **ImpL2<sup>cds</sup>** corresponds to  $w^{1118}/w^{1118}; Hml\Delta-Gal4/+; P\{tubPGal80ts\}/UAS-ImpL2^{cds}$

533 **TRiP<sup>control</sup>** refers to  $w^{1118}/+; Hml\Delta-Gal4/+; P\{tubPGal80ts\}/TRiP^{control}$

534 **w<sup>1118</sup>** corresponds to  $w^{1118}/w^{1118}; Hml\Delta-Gal4/+; P\{tubPGal80ts\}/+$

535

## 536 **Hypoxic enhancer activity analysis**

537 Genome-wide experimental data characterizing hypoxia-induced transcriptional enhancer activity

538 (Kamps-Hughes et al. 2015) was used to analyze the ImpL2 region for hypoxic enhancers. Hypoxic

539 transcriptional induction is defined as the ratio of expressed randomer tag counts in hypoxic versus

540 normoxic conditions and was binned by 500-bp regions across the *Impl2* locus. Each 500-bp bin was  
541 then analyzed for transcription factor binding sites corresponding to hypoxic (Hif1 $\alpha$ ), immune (Rel)  
542 and stress (HSF) response transcription factors. Transcription factor position frequency matrices  
543 were downloaded from the JASPAR database  
544 ([https://academic.oup.com/nar/article/32/suppl\\_1/D91/2505159](https://academic.oup.com/nar/article/32/suppl_1/D91/2505159)) and queried against the 500-bp  
545 bin sequences using BOBRO software (<https://www.ncbi.nlm.nih.gov/pmc/articles/PMC3074163/>).  
546 BOBRO generates a p-value of enrichment for the position frequency matrix within the search  
547 sequence and also identifies the location of the predicted binding sites.

548

#### 549 **Chip-qPCR assay**

550 The Pro-A Drosophila CHIP Seq Kit (Chromatrap) was used to co-immunoprecipitate genomic regions  
551 specifically bound by the transcription factor HIF1 $\alpha$ . A transgenic fly strain carrying the Hif1 $\alpha$  protein  
552 fused to GFP (BDSC: 42672) was used for this purpose. The procedure was performed according to  
553 the supplier's instructions. Briefly, the slurry was prepared by homogenizing ten infected or PBS  
554 injected males in three biological replicates. The Rabbit Anti-GFP antibody (ABfinity) was bound to  
555 the chromatographic column. Genomic DNA was fragmented to an approximate size of 500 bp by  
556 three cycles of 60-second sonication. The fragment size was verified by gel electrophoresis. All  
557 samples were tested with positive and negative controls. The amount of precipitated genomic  
558 fragments was normalized to the amount of fragments in slurry before precipitation. The *Impl2*-RA  
559 promoter sequence was covered with seven primer pairs corresponding to the 500-bp bins upstream  
560 of the transcription start site previously assessed in the *in silico* analysis. The genomic region of S-  
561 adenosylmethionine synthetase was used as a negative control since it does not contain any  
562 sequences of hypoxia response elements. Primer sequences are listed in the Key Resources Table.  
563 The amount of HIF1 $\alpha$ -bound regions of the *Impl2* promoter was quantified on a 96CFX 1000 Touch  
564 Real-Time Cycler (BioRad) using TP 2x SYBR Master Mix (Top-Bio) in three technical replicates with

565 the following protocol: initial denaturation - 3 min at 95°C, amplification – 15 s at 94°C, 20 s at 56°C,  
566 25 s at 72°C for 40 cycles. Melting curve analysis was performed at 65–85°C/step 0.5°C. The qPCR  
567 data were analyzed using double delta Ct analysis

568

### 569 **Gene expression analysis**

570 Gene expression analyzes were performed on several types of samples: six whole flies, six thoraxes,  
571 six fat bodies, or 20,000 isolated macrophages. Macrophages were isolated by a cell sorter (S3e Cell  
572 Sorter, BioRad) as described in the section Isolation of macrophages, while dissections were made in  
573 PBS, transferred to TRIzol Reagent (Invitrogen) and homogenized using a DEPC-treated pestle.  
574 Subsequently, RNA was extracted by TRIzol Reagent (Invitrogen) according to the manufacturer's  
575 protocol. Superscript III Reverse Transcriptase (Invitrogen) primed by oligo(dT)20 primer was used for  
576 reverse transcription. Relative expression rates for particular genes were quantified on a 384CFX  
577 1000 Touch Real-Time Cycler (BioRad) using the TP 2x SYBR Master Mix (Top-Bio) in three technical  
578 replicates with the following protocol: initial denaturation - 3 min at 95°C, amplification – 15 s at  
579 94°C, 20 s at 56°C, 25 s at 72°C for 40 cycles. Melting curve analysis was performed at 65–85°C/step  
580 0.5°C. The primer sequences are listed in the Key Resources Table. The qPCR data were analyzed  
581 using double delta Ct analysis, and the expressions of specific genes were normalized to the  
582 expression of Ribosomal protein 49 (Rp49) in the corresponding sample. The relative values (fold  
583 change) to control are shown in the graphs. Samples for gene expression analysis were collected  
584 from three independent experiments.

585

### 586 **Metabolite measurement**

587 To measure metabolite concentration, isolated macrophages, whole flies or hemolymph were used.  
588 Hemolymph was isolated from 25 adult males by centrifugation (14,000 RPM, 5 min) through a

589 silicagel filter into 50  $\mu$ L of PBS. For measurement of metabolites from whole flies, five flies were  
590 homogenized in 200  $\mu$ L of PBS and centrifuged (3 min, 4°C, 8,000 RPM) to discard insoluble debris.  
591 50,000 macrophages were isolated by cell sorter (S3e Cell Sorter, BioRad) as described in the section  
592 Isolation of macrophages. Half of all samples were used for the quantification of proteins. Samples  
593 for glucose, glycogen, trehalose, and triglyceride measurement were denatured at 75°C for 10 min,  
594 whereas samples for protein quantification were frozen immediately in -80°C. Glucose was measured  
595 using a Glucose (GO) Assay (GAGO-20) Kit (Sigma) according to the manufacturer's protocol.  
596 Colorimetric reaction was measured at 540 nm. For glycogen quantification, sample was mixed with  
597 amyloglucosidase (Sigma) and incubated at 37°C for 30 min. A Bicinchoninic Acid Assay (BCA) Kit  
598 (Sigma) was used for protein quantification according to the supplier's protocol and the absorbance  
599 was measured at 595 nm. Cholesterol and cholesteryl esters were measured on isolated lipid fraction  
600 by using Cholesterol/Cholesteryl Ester Quantitation Kit (Sigma) according to the supplier's protocol.  
601 Triglycerides were measured using Triglyceride quantification Colorimetric/Fluorometric Kit (Sigma).  
602 For trehalose quantification, sample was mixed with trehalase (Sigma) and incubated at 37°C for 30  
603 min. Samples for metabolite concentration were collected from three independent experiments.

604

#### 605 **Staining of lipid droplets**

606 Flies were dissected in Grace's Insect Medium (Sigma) and subsequently stained with DAPI and Cell  
607 Brite Fix Membrane Stain 488 (Biotium) diluted with Grace's Insect Medium according to the  
608 manufacturer's protocol at 37°C. Tissues were washed in PBS and then fixed with 4% PFA  
609 (Polysciences). After 20 min, the tissues were washed in PBS and pre-washed with 60% isopropanol.  
610 Dissected abdomens were then stained with OilRedO dissolved in 60% isopropanol for 10 min. The  
611 tissues were then washed with 60% isopropanol and mounted in an Aqua Polymount (Polysciences).  
612 Tissues were imaged using an Olympus FluoView 3000 confocal microscope (Olympus). Content of  
613 lipids in adipose tissue and size of lipid droplets were analyzed using Fiji software. Flies for the

614 analysis of lipid droplets in the fat body were collected from three independent experiments and  
615 representative images are shown.

616

### 617 **Lipidomic analysis**

618 Adipose tissues from six flies from each group were dissected in ice-cold PBS for lipidomics analysis.  
619 The removed tissues were stored in PBS buffer in Eppendorf tubes at – 80 °C. Immediately after  
620 thawing, they were extracted by 500 µl of cold chloroform: methanol solution (v/v; 1:1). The samples  
621 were then homogenized by a Tissue Lyser II (Qiagen, Prague, Czech Republic) at 50 Hz, -18°C for 5  
622 min and kept further in an ultrasonic bath (0°C, 5 min). Further, the mixture was centrifuged at  
623 10,000 RPM at 4°C for 10 min followed by the removal of the supernatant. The extraction step was  
624 repeated at the same conditions. The lower layer of pooled supernatant was evaporated to dryness  
625 under a gentle stream of Argon. The dry total lipid extract was re-dissolved in 500 µl of chloroform:  
626 methanol solution (v/v; 1:1) and directly measured using previously described methods (Bayley et al.  
627 2020). Briefly, high performance liquid chromatography (Accela 600 pump, Accela AS autosampler)  
628 combined with mass spectrometry LTQ-XL (all Thermo Fisher Scientific, San Jose, CA, USA) were used.  
629 The chromatographic conditions were as follows: Injection volume 5 µl; column Gemini 3 µM C18  
630 HPLC column (150 × 2 mm ID, Phenomenex, Torrance, CA, USA) at 35°C; the mobile phase (A) 5 mM  
631 ammonium acetate in methanol with ammonia (0.025%), (B) water and (C) isopropanol: MeOH (8:2);  
632 gradient change of A:B:C as follows: 0 min: 92:8:0, 7 min: 97:3:0, 12 min: 100:0:0, 19 min: 93:0:7, 20-  
633 29 min: 90:0:10, 40-45 min: 40:0:60, 48 min: 100:0:0, and 50-65 min: 92:8:0 with flow rate 200  
634 µl/min. The mass spectrometry condition: positive (3 kV) and negative (-2,5 kV) ion detection mode;  
635 capillary temperature 200°C. Eluted ions were detected with full scan mode from 200 to 1000 Da  
636 with the collisionally induced MS2 fragmentation (NCE 35). Data were acquired and processed by  
637 means of XCalibur 4.0 software (Thermo Fisher). The corrected areas under individual analytical  
638 peaks were expressed in percentages assuming that the total area of all detected is 100%.

639

#### 640 **Autophagy visualization**

641 To visualize autophagy in adipose tissue, Atg8a-mCherry-bearing flies were dissected in PBS, fixed  
642 with 4% PFA, and then washed with PBS and stained with DAPI. Fat bodies were imaged using an  
643 Olympus FluoView 3000 confocal microscope (Olympus).

644

#### 645 **Immunostaining**

646 Flies were dissected in ice-cold PBS and fixed with 4% PFA in PBS (Polysciences) for 20 minutes. After  
647 three washes in PBS-Tween (0.1%), nonspecific binding was blocked by 10% NGS in PBS for 1 hour at  
648 RT. Tissues were then incubated with primary antibodies (for NimC1: Mouse anti-NimC1 antibody  
649 P1a+b, 1:100, kindly provided by István Andó); for Foxo: Rabbit anti-Foxo, CosmoBio, 1:1,000; for  
650 tGPH: Rabbit anti-GFP, ABfinity, 1:100) at 4°C overnight. After washing the unbound primary  
651 antibody (three times for 10 min in PBS-Tween), secondary antibody was applied at a dilution of  
652 1:250 for 2 hours at RT (Goat anti-Mouse IgG (H+L) Alexa 555, Invitrogen or Goat anti-Rabbit IgG (H+L)  
653 Cy2, Jackson-ImmunoResearch). Nuclei were stained with DAPI. Tissues were mounted with Aqua  
654 Polymount (Polysciences). Tissues were imaged using an Olympus FluoView 3000 confocal  
655 microscope (Olympus) and images were reconstructed using Fiji software. Foxo localization was  
656 detected by Plot-Profile analysis using Fiji software.

657

#### 658 **Isolation of macrophages**

659 GFP-labeled macrophages were isolated from *Crq-Gal4, UAS-eGFP* male flies using fluorescence-  
660 activated cell sorting (FACS). Approximately 200 flies were anaesthetized with CO<sub>2</sub>, washed in PBS  
661 and homogenized in 600 mL of PBS using a pestle. The homogenate was sieved through a nylon cell  
662 strainer (40 µm). This strainer was then additionally washed with 200 µL of PBS, which was added to

663 the homogenate subsequently. The samples were centrifuged (3 min, 4°C, 3,500 RPM) and the  
664 supernatant was washed with ice-cold PBS after each centrifugation (three times). Prior to sorting,  
665 samples were transferred to FACS polystyrene tubes using a disposable bacterial filter (50 µm,  
666 Sysmex) and macrophages were sorted into 100 µL of PBS using a S3™ Cell Sorter (BioRad). Isolated  
667 cells were verified by fluorescence microscopy and differential interference contrast.

668

#### 669 **Phagocytic activity**

670 To analyze phagocytic rate, flies were infected with 20,000 of *S. pneumoniae* and after 24 h, they  
671 were injected with 50 nl of pHrodo™ Red *S. aureus* (Thermo Fischer Scientific). After 1 h, abdomens  
672 of flies were dissected in PBS and then fixed for 20 min with 4% PFA. Aqua Polymount (Polysciences)  
673 was used to mount the sample. Macrophages were imaged using an Olympus FluoView 3000  
674 confocal microscope and red dots depicting phagocytic events were manually counted per cell.

675

#### 676 **Lipoprotein uptake**

677 To analyze lipoprotein uptake by *Drosophila* macrophages, Crq>GFP flies were injected with 50 nl of  
678 1x (corresponding to physiological concentration), 5x or 10x concentrated pHrodo™ Red LDL  
679 (Invitrogen) into the ventrolateral side of the abdomen using an Eppendorf Femtojet microinjector.  
680 After 1 hour, the fly abdomens were opened in PBS and subsequently fixed for 20 min with 4% PFA in  
681 PBS (Polysciences). Aqua Polymount (Polysciences) was used to mount the sample. Macrophages  
682 were imaged using an Olympus FluoView 3000 confocal microscope.

683

#### 684 **Bacterial strain and fly injection**



685 The *Streptococcus pneumoniae* strain EJ1 was stored at -80°C in Tryptic Soy Broth (TSB) media  
686 containing 10% glycerol. For the experiments, bacteria were streaked onto agar plates containing 3%  
687 TSB and 100 mg/mL streptomycin and subsequently incubated at 37°C in 5% CO<sub>2</sub> overnight. Single  
688 colonies were inoculated into 3 mL of TSB liquid media with 100 mg/mL of streptomycin and 100,000  
689 units of catalase and incubated at 37°C + 5% CO<sub>2</sub> overnight. Bacterial density was measured after an  
690 additional 4 h so that it reached an approximate 0.4 OD<sub>600</sub>. Final bacterial cultures were centrifuged  
691 and dissolved in PBS so the final OD reached 2.4. The *S. pneumoniae* culture was kept on ice prior to  
692 injection and during the injection itself. Seven-day-old males were anaesthetized with CO<sub>2</sub> and  
693 injected with 50 nL culture containing 20,000 *S. pneumoniae* bacteria or 50 nL of mock buffer (PBS)  
694 into the ventrolateral side of the abdomen using an Eppendorf Femtojet microinjector. The *Listeria*  
695 *monocytogenes* strain 10403S was stored at -80°C in brain and heart infusion (BHI) broth containing  
696 25% glycerol. For the experiments bacteria were streaked onto Luria Bertani (LB) agar plates  
697 containing 100 µg/mL streptomycin and incubated at 37°C overnight; plates were stored at 4°C and  
698 used for inoculation for a period of two weeks. Single colonies were used to inoculate 3 mL of BHI  
699 and incubated overnight at 37°C without shaking to obtain a morning 600 nm optical density (OD<sub>600</sub>)  
700 of approx. 0.4. Further, *L. monocytogenes* cultures were diluted to OD<sub>600</sub> 0.01 in phosphate  
701 buffered saline (PBS) and stored on ice prior to loading into an injection needle. Approximately 1,000  
702 *Listeria* per fly were injected.

703

#### 704 **Survival analysis**

705 *Streptococcus*-injected flies were kept at 29°C in vials with approximately 30 individuals per vial and  
706 were transferred to fresh food every other day. *Listeria*-injected flies were kept at 25°C. Dead flies  
707 were counted daily. At least three independent experiments were performed and combined into a  
708 single survival curve generated in Graphpad Prism software; individual experiments showed

709 comparable results. The average number of individuals was more than 500 for each genotype and  
710 replicate.

711

## 712 **Pathogen load measurement**

713 Single flies were homogenized in PBS using a motorized plastic pestle in 1.5 mL tubes. Bacteria were  
714 plated in spots onto LB (*L. monocytogenes*) or TSB (*S. pneumoniae*) agar plates containing  
715 streptomycin in serial dilutions and incubated overnight at 37°C before manual counting. To  
716 determine intracellular *L. monocytogenes* loads, flies were injected with 50 nL of gentamycin solution  
717 (1 mg/mL in PBS) 3 h prior to fly homogenization. Pathogen loads of 16 flies were determined for  
718 each genotype and treatment in each experiment; at least three independent infection experiments  
719 were conducted and the results were combined into one graph (in all presented cases, individual  
720 experiments showed comparable results).

721

## 722 **THP-1 cell lines**

723 THP-1 cells were cultured at 37°C, 5% CO<sub>2</sub>, in RPMI-1640 medium (Sigma), supplemented with 2 mM  
724 glutamine (Applichem), 2 g/L sodium bicarbonate (J&K Scientific), 10% FBS (Biosera) and 100 mg/L  
725 streptomycin (Sigma). Prior to the experiment, cells were transferred to 24-well plates at 10<sup>5</sup>  
726 cells/well in four biological replicates. THP-1 cells were activated with phorbol-12-myristate-13-  
727 acetate (200 ng/mL, MedChemExpress). After 24 hours, *S. pneumoniae* bacteria were added (MOI 50  
728 bacteria/macrophage) and the plate was centrifuged briefly (2 min, 200xg). Following 6-h incubation,  
729 the cells were washed with RPMI-1640 medium, and fresh RPMI-1640 supplemented with  
730 gentamycin (0.1 mg/mL, Sigma) was added. After 1 h incubation, the medium was replaced with  
731 RPMI-1640 supplemented with penicillin-streptomycin (1%, Biosera). After another 17 h, the cells  
732 were harvested into TRIzol Reagent (Invitrogen) followed by RNA isolation.

733

734 **Statistics**

735 All data were analyzed using Graphpad Prism software; specific tests are listed for each graph in the  
736 figure legend.

737

738 **Key resources table**

739

| Reagent type (species) or resource                            | Designation                           | Source reference            | Identifier      | Additional information |
|---------------------------------------------------------------|---------------------------------------|-----------------------------|-----------------|------------------------|
| Strain, strain background ( <i>Streptococcus pneumoniae</i> ) | EJ1 strain                            | Provided by David Schneider |                 | Dilution 20,000 units  |
| Chemical compound, drug                                       | TRIzol Reagent                        | Invitrogen                  | Cat# 15-596-018 |                        |
| Chemical compound, drug                                       | Superscript III Reverse Transcriptase | Invitrogen                  | Cat# 18080044   |                        |
| Chemical compound, drug                                       | 2x SYBR Master Mix                    | Top-Bio                     | Cat# T607       |                        |
| Chemical compound, drug                                       | Grace's Insect Medium                 | Sigma                       | Cat# G9771-1L   |                        |
| Chemical compound, drug                                       | OilRedO                               | Sigma                       | Cat# O0625-25G  |                        |
| Chemical compound, drug                                       | DAPI                                  | Sigma                       | Cat# D9542      |                        |
| Chemical compound,                                            | Cell Brite Fix Membrane Stain 488     | Biotium                     | Cat# 30090-T    |                        |

| Reagent type (species) or resource | Designation                                                    | Source reference | Identifier        | Additional information |
|------------------------------------|----------------------------------------------------------------|------------------|-------------------|------------------------|
| drug                               |                                                                |                  |                   |                        |
| Chemical compound, drug            | Alexa Fluor™ Plus 405 Phalloidin                               | Invitrogen       | Cat# A30104       |                        |
| Chemical compound, drug            | Pro-A Drosophila CHIP Seq Kit                                  | Chromatrap       | Cat# 500274       |                        |
| Chemical compound, drug            | pHrodo™ Red S. aureus Bioparticles™ Conjugate for Phagocytosis | ThermoFisher     | Cat# A10010       |                        |
| Chemical compound, drug            | pHrodo™ Red LDL                                                | Invitrogen       | Cat# L34356       |                        |
| Chemical compound, drug            | Phorbol-12-myristate-13-acetate                                | MedChemExpress   | Cat# HY-18739     |                        |
| Chemical compound, drug            | RPMI-1640 Medium                                               | Sigma            | Cat# R7755        |                        |
| Chemical compound, drug            | Glutamine                                                      | Applichem        | Cat# A3704        |                        |
| Chemical compound, drug            | Gentamycin                                                     | Sigma            | Cat# 1405-41-0    |                        |
| Chemical compound, drug            | FBS                                                            | Biosera          | Cat# FB-1001      |                        |
| Chemical compound, drug            | Penicilin-Streptomycin                                         | Biosera          | Cat# XC-A4122/100 |                        |
| Antibody                           | Rabbit Anti-GFP                                                | ABfinity         | Cat# G10362       |                        |

| Reagent type (species) or resource                 | Designation                                                                                                       | Source reference                              | Identifier       | Additional information |
|----------------------------------------------------|-------------------------------------------------------------------------------------------------------------------|-----------------------------------------------|------------------|------------------------|
| Antibody                                           | Anti-NimC1 (P1a+b)                                                                                                | Kindly gifted by István Andó                  |                  |                        |
| Antibody                                           | Goat anti-Mouse IgG (H+L) Alexa 555                                                                               | Invitrogen                                    | A28180           |                        |
| Antibody                                           | Rabbit Drosophila anti-Foxo                                                                                       | CosmoBio                                      | Cat# THU-A-DFoxo |                        |
| Antibody                                           | Goat anti-Rabbit IgG (H+L) Cy2                                                                                    | Jackson-ImmunoResearch                        | AB_2338021       |                        |
| Commercial assay, kit                              | Glucose (GO) Assay Kit                                                                                            | Sigma                                         | Cat# GAGO20-1KT  |                        |
| Commercial assay, kit                              | Bicinchoninic Acid Assay Kit                                                                                      | Sigma                                         | Cat# BCA1        |                        |
| Commercial assay, kit                              | Cholesterol/Cholesteryl Ester Quantitation Kit                                                                    | Sigma                                         | Cat# 428901-1KIT |                        |
| Commercial assay, kit                              | Triglyceride quantification Colorimetric/Fluorometric Kit                                                         | Sigma                                         | Cat# MAK266-1KT  |                        |
| Chemical compound, drug                            | Trehalase from porcine kidney                                                                                     | Sigma                                         | Cat# T8778-1UN   |                        |
| Genetic reagent ( <i>Drosophila melanogaster</i> ) | <i>HmlG4G80: w<sup>1118</sup>; HmlΔ-Gal4; P{tubPGal80ts}</i>                                                      | Cross made in our laboratory by Tomas Dolezal |                  |                        |
| Genetic reagent ( <i>Drosophila melanogaster</i> ) | <i>w<sup>1118</sup>; HmlΔ-Gal4 P{tubPGal80ts}/+; P{w[+mGT]=GT1}foxo<sup>BG01018</sup>/UAS-Impl2<sup>cds</sup></i> | Cross made in our laboratory by Tomas Dolezal |                  |                        |
| Genetic reagent ( <i>Drosophila melanogaster</i> ) | <i>w<sup>1118</sup>; HmlΔ-Gal4 P{tubPGal80ts}/+; tGPH-GFP/TRiP<sup>control</sup></i>                              | Cross made in our laboratory by Tomas Dolezal |                  |                        |
| Genetic reagent ( <i>Drosophila</i> )              | <i>w<sup>1118</sup>; PBac{sim-</i>                                                                                | Bloomington                                   | BDSC:            |                        |

| Reagent type (species) or resource                 | Designation                                                                | Source reference                    | Identifier    | Additional information |
|----------------------------------------------------|----------------------------------------------------------------------------|-------------------------------------|---------------|------------------------|
| <i>melanogaster</i> )                              | <i>GFP.AC.FPTB</i> }VK00037                                                | Drosophila Stock Center             | 42672         |                        |
| Genetic reagent ( <i>Drosophila melanogaster</i> ) | ImpL2 <sup>RNAi</sup>                                                      | Bloomington Drosophila Stock Center |               |                        |
| Genetic reagent ( <i>Drosophila melanogaster</i> ) | ImpL2-RA-Gal4                                                              | Provided by Hugo Stocker            |               |                        |
| Genetic reagent ( <i>Drosophila melanogaster</i> ) | Atg8a-mCherry                                                              | Provided by Gabor Juhasz            |               |                        |
| Genetic reagent ( <i>Drosophila melanogaster</i> ) | ImpL2 <sup>cds</sup>                                                       | Provided by Hugo Stocker            |               |                        |
| Genetic reagent ( <i>Drosophila melanogaster</i> ) | 20xUAS-6xmCherry                                                           | Bloomington Drosophila Stock Center |               |                        |
| Genetic reagent ( <i>Drosophila melanogaster</i> ) | CrqGal4>2xeGFP                                                             | Provided by Marc C. Dionne          |               |                        |
| Genetic reagent ( <i>D. melanogaster</i> )         | <i>Hif1α</i> [RNAi]: P{KK110834}VIE-260B                                   | Vienna Drosophila Resource Center   | VDRC: v106504 | FBst0478328            |
| Genetic reagent ( <i>D. melanogaster</i> )         | <i>TRiP</i> <sup>control</sup> : <i>y(1) v(1)</i> ; P{y[+t7.7]=CaryP}attP2 | Bloomington Drosophila Stock Center | BDSC: 36303   | FBst0036303            |
| Genetic reagent ( <i>D. melanogaster</i> )         | <i>w</i> <sup>1118</sup>                                                   | Genetic background based on CantonS |               |                        |
| Sequence-based reagent                             | Foxo forward: CAATGCAAGAGATGGTCTCTC                                        | KRD                                 | CG3143        | FBgn0038197            |
| Sequence-based reagent                             | Foxo reverse: TGACCAGGTTCTGTTGACC                                          | KRD                                 | CG3143        | FBgn0038197            |
| Sequence-based                                     | 4EBP Forward: CCATGATCACCAGGAAGGTTGTC                                      | KRD                                 | CG8846        | FBgn0261560            |

| Reagent type (species) or resource | Designation                                    | Source reference | Identifier | Additional information |
|------------------------------------|------------------------------------------------|------------------|------------|------------------------|
| reagent                            | A                                              |                  |            |                        |
| Sequence-based reagent             | 4EBP Reverse:<br>AGCCCGCTCGTAGATAAGTTTGG<br>T  | KRD              | CG8846     | FBgn0261560            |
| Sequence-based reagent             | EIF-4E Forward:<br>AAGAAGAACATTCCGCCATG T      | KRD              | CG4035     | FBgn0015218            |
| Sequence-based reagent             | EIF-4E Reverse:<br>GGACTGCCGACGGAAACAAC        | KRD              | CG4035     | FBgn0015218            |
| Sequence-based reagent             | Glut-CoA deh Forward:<br>CTGATTGGTGCCTTTGGCC   | KRD              | CG9547     | FBgn0031824            |
| Sequence-based reagent             | Glut-CoA deh Reverse:<br>ATAGCGAGCGTTGTTTCAGAC | KRD              | CG9547     | FBgn0031824            |
| Sequence-based reagent             | Lip4 Forward:<br>CCACTTGGGTGATGATGGGAC         | KRD              | CG6113     | FBgn0032264            |
| Sequence-based reagent             | Lip4 Reverse:<br>ACGTATTGCCACGAACATTGG         | KRD              | CG6113     | FBgn0032264            |
| Sequence-based reagent             | MTP Forward:<br>GAATCGAAATGCCAGACG             | KRD              | CG9342     | FBgn0266369            |
| Sequence-based reagent             | MTP Reverse:<br>AACGTTGGTTTGTGTTGAGAAGC        | KRD              | CG9342     | FBgn0266369            |
| Sequence-based reagent             | HSL Forward:<br>CAGTCCTACGAGATTCACGG           | KRD              | CG11055    | FBgn0034491            |
| Sequence-based reagent             | HSL Reverse:<br>GGCTTCGTTGGATAACATTGTG         | KRD              | CG11055    | FBgn0034491            |
| Sequence-based reagent             | Bmm Forward:<br>CACCGCGCCGAATGAATGTATA<br>A    | KRD              | CG5295     | FBgn0036449            |
| Sequence-based reagent             | Bmm Reverse:<br>TTCAATCACTGTTTGTGCGGTCGG<br>C  | KRD              | CG5295     | FBgn0036449            |
| Sequence-based reagent             | GlyP Forward:                                  | KRD              | CG7254     | FBgn0004507            |

| Reagent type (species) or resource | Designation                               | Source reference | Identifier | Additional information |
|------------------------------------|-------------------------------------------|------------------|------------|------------------------|
| reagent                            | TCCACCCTGAGGGACTACTAC                     |                  |            |                        |
| Sequence-based reagent             | GlyP Reverse:<br>GGTGTGGTTCAGTGAGCGAC     | KRD              | CG7254     | FBgn0004507            |
| Sequence-based reagent             | GlyS Forward:<br>CGATGAAGAAGTACAGGGTC     | KRD              | CG6904     | FBgn0266064            |
| Sequence-based reagent             | GlyS Reverse:<br>TATCATCGTTATTGCCTGGAG    | KRD              | CG6904     | FBgn0266064            |
| Sequence-based reagent             | apoLTP Forward:<br>TGGGTGGATTGAAGCCACAG   | KRD              | CG15828    | FBgn0032136            |
| Sequence-based reagent             | apoLTP Reverse:<br>TGAGTGGATTTTCTCTCACTGC | KRD              | CG15828    | FBgn0032136            |
| Sequence-based reagent             | apoLPP Forward:<br>TTGGAATCCTAGCTTCTGTGCT | KRD              | CG11064    | FBgn0087002            |
| Sequence-based reagent             | apoLPP Reverse:<br>AGTCATAGTAGTTGCCGGGTAT | KRD              | CG11064    | FBgn0087002            |
| Sequence-based reagent             | Atg1 Forward:<br>CTAAAGCCGTCGTCCAATGT     | KRD              | CG10967    | FBgn0260945            |
| Sequence-based reagent             | Atg1 Reverse:<br>GAACAGCATGCTCCGGTATT     | KRD              | CG10967    | FBgn0260945            |
| Sequence-based reagent             | Atg6 Forward:<br>CGGAGTTATCTTGCCCATCT     | KRD              | CG5429     | FBgn0264325            |
| Sequence-based reagent             | Atg6 Reverse:<br>GTGCTACACGCTGTTGCTC      | KRD              | CG5429     | FBgn0264325            |
| Sequence-based reagent             | Rp49 Forward:<br>AAGCTGTCGCACAAATGGCG     | KRD              | CG7939     | FBgn0002626            |
| Sequence-based reagent             | Rp49 Reverse:<br>GCACGTTGTGACCAAGGAAC     | KRD              | CG7939     | FBgn0002626            |
| Sequence-based reagent             | Impl2 Forward:<br>TTCGCGGTTTCTGGGCACCC    | KRD              | CG15009    | FBgn0001257            |



| Reagent type (species) or resource | Designation                                     | Source reference | Identifier  | Additional information |
|------------------------------------|-------------------------------------------------|------------------|-------------|------------------------|
| Sequence-based reagent             | Impl2 Reverse:<br>GCGCGTCCGATCGTCGATA           | KRD              | CG15009     | FBgn0001257            |
| Sequence-based reagent             | Impl2-RA Forward:<br>GTGCCAACGAAGCTTCGAGTG      | KRD              | CG15009     | FBgn0001257            |
| Sequence-based reagent             | Impl2-RA Reverse:<br>GCGTGGCTTCTCCTCCTCC        | KRD              | CG15009     | FBgn0001257            |
| Sequence-based reagent             | Impl2-RB, D Forward:<br>GTCGTGCGAAAGGATACCGC    | KRD              | CG15009     | FBgn0001257            |
| Sequence-based reagent             | Impl2-RB, D Reverse:<br>TTCCGTGTCATCAATCAATAGCC | KRD              | CG15009     | FBgn0001257            |
| Sequence-based reagent             | Impl2-RC Forward:<br>ATAGACTCGGAGACCTCCCC       | KRD              | CG15009     | FBgn0001257            |
| Sequence-based reagent             | Impl2-RC Reverse:<br>GCGTGGCTTCTCCTCCTCC        | KRD              | CG15009     | FBgn0001257            |
| Sequence-based reagent             | IGFBP7 Forward:<br>GCCATCACCCAGGTCAGCAAG        | KRD              | GC04M057030 |                        |
| Sequence-based reagent             | IGFBP7 Reverse:<br>GGATTCCGATGACCTCACAGCT       | KRD              | GC04M057030 |                        |
| Sequence-based reagent             | ACTB Forward:<br>ATTGCCGACAGGATGCAGAA           | KRD              | GC07M005527 |                        |
| Sequence-based reagent             | ACTB Reverse:<br>GCTGATCCACATCTGCTGGAA          | KRD              | GC07M005527 |                        |
| Sequence-based reagent             | IGFBP1 Forward:<br>TCCTTTGGGACGCCATCAGTAC       | KRD              | GC07P046552 |                        |
| Sequence-based reagent             | IGFBP1 Reverse:<br>GATGTCTCCTGTGCCTTGGCTA       | KRD              | GC07P046552 |                        |

| Reagent type (species) or resource | Designation                                | Source reference | Identifier      | Additional information |
|------------------------------------|--------------------------------------------|------------------|-----------------|------------------------|
| Sequence-based reagent             | IGFBP2 Forward:<br>CGAGGGCACTGTGAGAAGCG    | KRD              | GC02P216<br>632 |                        |
| Sequence-based reagent             | IGFBP2 Reverse:<br>TGTTTCATGGTGCTGTCCACGTG | KRD              | GC02P216<br>632 |                        |
| Sequence-based reagent             | IGFBP3 Forward:<br>CGCTACAAAGTTGACTACGAGTC | KRD              | GC07M045<br>912 |                        |
| Sequence-based reagent             | IGFBP3 Reverse:<br>GTCTTCCATTTCTCTACGGCAGG | KRD              | GC07M045<br>912 |                        |
| Sequence-based reagent             | IGFBP4 Forward:<br>ACCCACGAGGACCTCTACATCA  | KRD              | GC17P040<br>443 |                        |
| Sequence-based reagent             | IGFBP4 Reverse:<br>CACACCAGCACTTGCCACGCT   | KRD              | GC17P040<br>443 |                        |
| Sequence-based reagent             | IGFBP5 Forward:<br>CGTGCTGTGTACCTGCCCAATT  | KRD              | GC02M216<br>672 |                        |
| Sequence-based reagent             | IGFBP5 Reverse:<br>ACTTGTCACGCACCAGCAGAT   | KRD              | GC02M216<br>672 |                        |
| Sequence-based reagent             | IGFBP6 Forward:<br>CACAGGATGTGAACCGCAGAGA  | KRD              | GC12P053<br>097 |                        |
| Sequence-based reagent             | IGFBP6 Reverse:<br>CACTGAGTCCAGATGTCTACGG  | KRD              | GC12P053<br>097 |                        |
| Sequence-based reagent             | Defensin Forward:<br>GTTCTTCGTTCTCGTGG     | KRD              | CG1385          | FBgn0010385            |
| Sequence-based reagent             | Defensin Reverse:<br>CTTTGAACCCCTTGGC      | KRD              | CG1385          | FBgn0010385            |
| Sequence-based reagent             | Metchnikowin Forward:<br>AACTTAATCTTGAGCGA | KRD              | CG8175          | FBgn0014865            |

| Reagent type (species) or resource | Designation                                | Source reference | Identifier | Additional information |
|------------------------------------|--------------------------------------------|------------------|------------|------------------------|
| Sequence-based reagent             | Metchnikowin Reverse:<br>CGGTCTTGGTTGGTTAG | KRD              | CG8175     | FBgn0014865            |
| Sequence-based reagent             | Drosocin Forward:<br>CCATCGTTTTCTGCT       | KRD              | CG10816    | FBgn0010388            |
| Sequence-based reagent             | Drosocin Reverse:<br>CCATCGTTTTCTGCT       | KRD              | CG10816    | FBgn0010388            |
| Sequence-based reagent             | Reg 1 Forward:<br>GAGCAAATTGGACTCTACAGG    | KRD              |            |                        |
| Sequence-based reagent             | Reg 1 Reverse:<br>GGGGAGCAACAAGTAACTCG     | KRD              |            |                        |
| Sequence-based reagent             | Reg 2 Forward:<br>CTTTGGGCTGATAATTCCGG     | KRD              |            |                        |
| Sequence-based reagent             | Reg 2 Reverse:<br>TACATATATCCATAGAACCACG   | KRD              |            |                        |
| Sequence-based reagent             | Reg 5 Forward:<br>AGCCATCCATCTATGTGCC      | KRD              |            |                        |
| Sequence-based reagent             | Reg 5 Reverse:<br>TCAAACGCCACGAGACGAC      | KRD              |            |                        |
| Sequence-based reagent             | Reg 7 Forward:<br>GCAACTCAAATTCTTCAAACCTCG | KRD              |            |                        |
| Sequence-based reagent             | Reg 7 Reverse:<br>TCGGACCACTTGCTTTGTGT     | KRD              |            |                        |
| Sequence-based reagent             | Reg 9 Forward:<br>GAACCGTCGCCTTCCAG        | KRD              |            |                        |

| Reagent type (species) or resource | Designation                              | Source reference                                                                        | Identifier              | Additional information                                               |
|------------------------------------|------------------------------------------|-----------------------------------------------------------------------------------------|-------------------------|----------------------------------------------------------------------|
| Sequence-based reagent             | Reg 9 Reverse:<br>TGCCATGCCATTTGTTTCGC   | KRD                                                                                     |                         |                                                                      |
| Sequence-based reagent             | Sam-S Forward:<br>CAAATCAGCGACGCTATCTTGG | KRD                                                                                     | CG2674                  | FBgn0005278                                                          |
| Sequence-based reagent             | Sam-S Reverse:<br>TGTCTCACGAACAACCTTCTGG | KRD                                                                                     | CG2674                  | FBgn0005278                                                          |
| Software, algorithm                | Graphpad Prism                           | <a href="https://www.graphpad.com/">https://www.graphpad.com/</a>                       | Graphpad Prism          | RRID: <a href="#">SCR_002798</a>                                     |
| Software, algorithm                | Microsoft Excel                          | <a href="https://www.microsoft.com/">https://www.microsoft.com/</a>                     | Microsoft Excel         |                                                                      |
| Software, algorithm                | Fiji                                     | ImageJ - <a href="https://fiji.sc">https://fiji.sc</a>                                  | ImageJ                  | RRID: <a href="#">SCR_002285</a>                                     |
| Other                              | S3e Cell Sorter                          | BioRad - <a href="http://www.biorad.com/">http://www.biorad.com/</a>                    | BioRad                  |                                                                      |
| Other                              | Olympus FluoView 3000                    | Olympus - <a href="https://www.olympus-global.com/">https://www.olympus-global.com/</a> | <a href="#">Olympus</a> | RRID: <a href="#">SCR_017015</a><br>RRID: <a href="#">SCR_014215</a> |
| Other                              | Olympus IX71                             | Olympus - <a href="https://www.olympus-global.com/">https://www.olympus-global.com/</a> | <a href="#">Olympus</a> |                                                                      |

740

741

## 742 References

743 Alee. 2011. "ImpL2 Represses Insulin Signaling in Response to Hypoxia." Dissertation Thesis.  
744 University of Oregon, Eugene, Oregon, USA.

745 Akiel, Maaged et al. 2017. "IGFBP7 Deletion Promotes Hepatocellular Carcinoma." *Cancer Research*  
746 77(15): 4014–25. [http://cancerres.aacrjournals.org/lookup/doi/10.1158/0008-5472.CAN-16-](http://cancerres.aacrjournals.org/lookup/doi/10.1158/0008-5472.CAN-16-2885)  
747 2885.

748 Alic, Nazif, Matthew P. Hoddinott, Giovanna Vinti, and Linda Partridge. 2011. "Lifespan Extension by  
749 Increased Expression of the Drosophila Homologue of the IGFBP7 Tumour Suppressor." *Aging*  
750 *Cell* 10(1): 137–47. <http://doi.wiley.com/10.1111/j.1474-9726.2010.00653.x>.

- 751 Andrejeva, Gabriela, and Jeffrey C. Rathmell. 2017. "Similarities and Distinctions of Cancer and  
752 Immune Metabolism in Inflammation and Tumors." *Cell Metabolism* 26(1): 49–70.  
753 <https://linkinghub.elsevier.com/retrieve/pii/S1550413117303467>.
- 754 Arquier, Nathalie et al. 2006. "Analysis of the Hypoxia-Sensing Pathway in *Drosophila Melanogaster*."  
755 *Biochemical Journal* 393(2): 471–80.  
756 <https://portlandpress.com/biochemj/article/393/2/471/78893/Analysis-of-the-hypoxiasensing-pathway-in>.  
757
- 758 Aspichueta, Patricia et al. 2012. "Disrupted VLDL Features and Lipoprotein Metabolism in Sepsis." In  
759 *Dyslipidemia - From Prevention to Treatment*, InTech.  
760 [http://www.intechopen.com/books/dyslipidemia-from-prevention-to-treatment/disrupted-](http://www.intechopen.com/books/dyslipidemia-from-prevention-to-treatment/disrupted-vldl-features-and-lipoprotein-metabolism-in-sepsis)  
761 [vldl-features-and-lipoprotein-metabolism-in-sepsis](http://www.intechopen.com/books/dyslipidemia-from-prevention-to-treatment/disrupted-vldl-features-and-lipoprotein-metabolism-in-sepsis).
- 762 Bader, R. et al. 2013. "The IGFBP7 Homolog Imp-L2 Promotes Insulin Signaling in Distinct Neurons of  
763 the *Drosophila* Brain." *Journal of Cell Science* 126(12): 2571–76.  
764 <http://jcs.biologists.org/cgi/doi/10.1242/jcs.120261>.
- 765 Bajgar, Adam et al. 2015. "Extracellular Adenosine Mediates a Systemic Metabolic Switch during  
766 Immune Response" ed. Marc S. Dionne. *PLOS Biology* 13(4): e1002135.  
767 <https://dx.plos.org/10.1371/journal.pbio.1002135>.
- 768 Bajgar, Adam, and Tomas Dolezal. 2018. "Extracellular Adenosine Modulates Host-Pathogen  
769 Interactions through Regulation of Systemic Metabolism during Immune Response in  
770 *Drosophila*" ed. Brian P. Lazzaro. *PLOS Pathogens* 14(4): e1007022.  
771 <https://dx.plos.org/10.1371/journal.ppat.1007022>.
- 772 Bayley, Jeppe Seamus et al. 2020. "Cold-Acclimation Increases Depolarization Resistance and  
773 Tolerance in Muscle Fibers from a Chill-Susceptible Insect, *Locusta Migratoria*." *American*  
774 *Journal of Physiology-Regulatory, Integrative and Comparative Physiology*: ajpregu.00068.2020.  
775 <https://journals.physiology.org/doi/10.1152/ajpregu.00068.2020>.
- 776 Biswas, Subhra K., and Alberto Mantovani. 2012. "Orchestration of Metabolism by Macrophages."  
777 *Cell Metabolism* 15(4): 432–37.  
778 <https://linkinghub.elsevier.com/retrieve/pii/S1550413112000150>.
- 779 Van den Bossche, Jan, Luke A. O'Neill, and Deepthi Menon. 2017. "Macrophage Immunometabolism:  
780 Where Are We (Going)?" *Trends in Immunology* 38(6): 395–406.  
781 <https://linkinghub.elsevier.com/retrieve/pii/S147149061730042X>.
- 782 Bunker, Brandon D et al. 2015. "The Transcriptional Response to Tumorigenic Polarity Loss in  
783 *Drosophila*." *eLife* 4. <http://www.ncbi.nlm.nih.gov/pubmed/25719210>.
- 784 Chen, Grisha Y., Daniel A. Pensinger, and John-Demian Sauer. 2017. "Listeria Monocytogenes  
785 Cytosolic Metabolism Promotes Replication, Survival, and Evasion of Innate Immunity." *Cellular*  
786 *Microbiology* 19(10): e12762. <https://onlinelibrary.wiley.com/doi/10.1111/cmi.12762>.
- 787 Chistiakov, Dimitry A. et al. 2017. "Mechanisms of Foam Cell Formation in Atherosclerosis." *Journal*  
788 *of Molecular Medicine* 95(11): 1153–65. <http://link.springer.com/10.1007/s00109-017-1575-8>.
- 789 Clark, Rebecca I. et al. 2011. "Multiple TGF- $\beta$  Superfamily Signals Modulate the Adult *Drosophila*  
790 Immune Response." *Current Biology* 21(19): 1672–77.  
791 <https://linkinghub.elsevier.com/retrieve/pii/S0960982211009547>.
- 792 Dev, R, E. Bruera, and S. Dalal. 2018. "Insulin Resistance and Body Composition in Cancer Patients."  
793 *Annals of Oncology* 29: ii18–26.  
794 <https://linkinghub.elsevier.com/retrieve/pii/S0923753419316801>.

- 795 Dionne, Marc S., Linh N. Pham, Mimi Shirasu-Hiza, and David S. Schneider. 2006. "Akt and Foxo  
796 Dysregulation Contribute to Infection-Induced Wasting in *Drosophila*." *Current Biology* 16(20):  
797 1977–85. <https://linkinghub.elsevier.com/retrieve/pii/S0960982206020641>.
- 798 Dolezal, Tomas et al. 2019. "Molecular Regulations of Metabolism during Immune Response in  
799 Insects." *Insect Biochemistry and Molecular Biology* 109: 31–42.  
800 <https://linkinghub.elsevier.com/retrieve/pii/S0965174818304600>.
- 801 Febbraio, Maria, Ella Guy, and Roy L. Silverstein. 2004. "Stem Cell Transplantation Reveals That  
802 Absence of Macrophage CD36 Is Protective Against Atherosclerosis." *Arteriosclerosis,  
803 Thrombosis, and Vascular Biology* 24(12): 2333–38.  
804 <https://www.ahajournals.org/doi/10.1161/01.ATV.0000148007.06370.68>.
- 805 Figueroa-Clarevega, Alejandra, and David Bilder. 2015. "Malignant *Drosophila* Tumors Interrupt  
806 Insulin Signaling to Induce Cachexia-like Wasting." *Developmental Cell* 33(1): 47–55.  
807 <https://linkinghub.elsevier.com/retrieve/pii/S1534580715001434>.
- 808 Gilbert, Lawrence I., and Haruo Chino. 1974. "Transport of Lipids in Insects." *Journal of Lipid Research*  
809 15(5): 439–56. <https://linkinghub.elsevier.com/retrieve/pii/S00222752036764X>.
- 810 Gunnerson, Kyle J. et al. 2016. "TIMP2•IGFBP7 Biomarker Panel Accurately Predicts Acute Kidney  
811 Injury in High-Risk Surgical Patients." *Journal of Trauma and Acute Care Surgery* 80(2): 243–49.  
812 <http://journals.lww.com/01586154-201602000-00009>.
- 813 H. Tomkin, Gerald. 2012. "LDL as a Cause of Atherosclerosis." *The Open Atherosclerosis & Thrombosis*  
814 *Journal* 5(1): 13–21. <http://benthamopen.com/ABSTRACT/TOATHERTJ-5-13>.
- 815 Harris, H W, J E Gosnell, and Z L Kumwenda. 2000. "The Lipemia of Sepsis: Triglyceride-Rich  
816 Lipoproteins as Agents of Innate Immunity." *Journal of endotoxin research* 6(6): 421–30.  
817 <http://www.ncbi.nlm.nih.gov/pubmed/11521066>.
- 818 Honegger, Basil et al. 2008. "Imp-L2, a Putative Homolog of Vertebrate IGF-Binding Protein 7,  
819 Counteracts Insulin Signaling in *Drosophila* and Is Essential for Starvation Resistance." *Journal of*  
820 *Biology* 7(3): 10. <http://jbiol.biomedcentral.com/articles/10.1186/jbiol72>.
- 821 Kamps-Hughes, Nick, Jessica L. Preston, Melissa A. Randel, and Eric A. Johnson. 2015. "Genome-Wide  
822 Identification of Hypoxia-Induced Enhancer Regions." *PeerJ* 3: e1527.  
823 <https://peerj.com/articles/1527>.
- 824 Kelly, Beth, and Luke AJ O'Neill. 2015. "Metabolic Reprogramming in Macrophages and Dendritic  
825 Cells in Innate Immunity." *Cell Research* 25(7): 771–84.  
826 <http://www.nature.com/articles/cr201568>.
- 827 Khovidhunkit, Weerapan et al. 2004. "Thematic Review Series: The Pathogenesis of Atherosclerosis.  
828 Effects of Infection and Inflammation on Lipid and Lipoprotein Metabolism Mechanisms and  
829 Consequences to the Host." *Journal of Lipid Research* 45(7): 1169–96.  
830 <http://www.jlr.org/lookup/doi/10.1194/jlr.R300019-JLR200>.
- 831 Krejčová, Gabriela et al. 2019. "*Drosophila* Macrophages Switch to Aerobic Glycolysis to Mount  
832 Effective Antibacterial Defense." *eLife* 8. <https://elifesciences.org/articles/50414>.
- 833 Kwon, Young et al. 2015. "Systemic Organ Wasting Induced by Localized Expression of the Secreted  
834 Insulin/IGF Antagonist ImpL2." *Developmental Cell* 33(1): 36–46.  
835 <https://linkinghub.elsevier.com/retrieve/pii/S1534580715001148>.
- 836 Li, Yan et al. 2013. "HIF- and Non-HIF-Regulated Hypoxic Responses Require the Estrogen-Related  
837 Receptor in *Drosophila Melanogaster*" ed. Eric Rulifson. *PLoS Genetics* 9(1): e1003230.

- 838 <https://dx.plos.org/10.1371/journal.pgen.1003230>.
- 839 Liu, Yi et al. 2015. "Serum IGFBP7 Levels Associate with Insulin Resistance and the Risk of Metabolic  
840 Syndrome in a Chinese Population." *Scientific Reports* 5(1): 10227.  
841 <http://www.nature.com/articles/srep10227>.
- 842 Louie, Alexander et al. 2016. "How Many Parameters Does It Take to Describe Disease Tolerance?"  
843 ed. Andy P. Dobson. *PLOS Biology* 14(4): e1002435.  
844 <https://dx.plos.org/10.1371/journal.pbio.1002435>.
- 845 Luong, Nancy et al. 2006. "Activated FOXO-Mediated Insulin Resistance Is Blocked by Reduction of  
846 TOR Activity." *Cell Metabolism* 4(2): 133–42.  
847 <https://linkinghub.elsevier.com/retrieve/pii/S1550413106002348>.
- 848 Martínez-Castillo, Moisés et al. 2020. "Differential Production of Insulin-like Growth Factor-Binding  
849 Proteins in Liver Fibrosis Progression." *Molecular and Cellular Biochemistry* 469(1–2): 65–75.  
850 <http://link.springer.com/10.1007/s11010-020-03728-4>.
- 851 Mohanraj L, Kim H-S, Li W, Cai Q, Kim KE, Shin H-J, et al. 2013. IGFBP-3 Inhibits Cytokine-Induced  
852 Insulin Resistance and Early Manifestations of Atherosclerosis. *PLoS ONE* 8(1): e55084.  
853 <https://doi.org/10.1371/journal.pone.0055084>
- 854 Molaei, Maral, Crissie Vandehoef, and Jason Karpac. 2019. "NF-KB Shapes Metabolic Adaptation by  
855 Attenuating Foxo-Mediated Lipolysis in Drosophila." *Developmental Cell* 49(5): 802-810.e6.  
856 <https://linkinghub.elsevier.com/retrieve/pii/S1534580719302795>.
- 857 Morgantini, Cecilia et al. 2019. "Liver Macrophages Regulate Systemic Metabolism through Non-  
858 Inflammatory Factors." *Nature Metabolism* 1(4): 445–59.  
859 <http://www.nature.com/articles/s42255-019-0044-9>.
- 860 Nagao, Ayako et al. 2019. "HIF-1-Dependent Reprogramming of Glucose Metabolic Pathway of  
861 Cancer Cells and Its Therapeutic Significance." *International Journal of Molecular Sciences* 20(2):  
862 238. <https://www.mdpi.com/1422-0067/20/2/238>.
- 863 Newsholme, P, R Curi, S Gordon, and E A Newsholme. 1986. "Metabolism of Glucose, Glutamine,  
864 Long-Chain Fatty Acids and Ketone Bodies by Murine Macrophages." *Biochemical Journal*  
865 239(1): 121–25. [https://portlandpress.com/biochemj/article/239/1/121/21648/Metabolism-of-](https://portlandpress.com/biochemj/article/239/1/121/21648/Metabolism-of-glucose-glutamine-longchain-fatty)  
866 [glucose-glutamine-longchain-fatty](https://portlandpress.com/biochemj/article/239/1/121/21648/Metabolism-of-glucose-glutamine-longchain-fatty).
- 867 Nicholson, David, and Lindsay B. Nicholson. 2008. "A Simple Immune System Simulation Reveals  
868 Optimal Movement and Cell Density Parameters for Successful Target Clearance." *Immunology*  
869 123(4): 519–27. <http://doi.wiley.com/10.1111/j.1365-2567.2007.02721.x>.
- 870 Odegaard, J. I., and A. Chawla. 2013. "Pleiotropic Actions of Insulin Resistance and Inflammation in  
871 Metabolic Homeostasis." *Science* 339(6116): 172–77.  
872 <https://www.sciencemag.org/lookup/doi/10.1126/science.1230721>.
- 873 Oh, Youngman et al. 1996. "Synthesis and Characterization of Insulin-like Growth Factor-Binding  
874 Protein (IGFBP)-7." *Journal of Biological Chemistry* 271(48): 30322–25.  
875 <http://www.jbc.org/lookup/doi/10.1074/jbc.271.48.30322>.
- 876 Okamoto, N. et al. 2013. "A Secreted Decoy of InR Antagonizes Insulin/IGF Signaling to Restrict Body  
877 Growth in Drosophila." *Genes & Development* 27(1): 87–97.  
878 <http://genesdev.cshlp.org/cgi/doi/10.1101/gad.204479.112>.
- 879 Owusu-Ansah, Edward, Wei Song, and Norbert Perrimon. 2013. "Muscle Mitohormesis Promotes  
880 Longevity via Systemic Repression of Insulin Signaling." *Cell* 155(3): 699–712.  
881 <https://linkinghub.elsevier.com/retrieve/pii/S0092867413011586>.

- 882 Péan, Claire B. et al. 2017. "Regulation of Phagocyte Triglyceride by a STAT-ATG2 Pathway Controls  
883 Mycobacterial Infection." *Nature Communications* 8(1): 14642.  
884 <http://www.nature.com/articles/ncomms14642>.
- 885 Podrez, Eugene A. et al. 2000. "Macrophage Scavenger Receptor CD36 Is the Major Receptor for LDL  
886 Modified by Monocyte-Generated Reactive Nitrogen Species." *Journal of Clinical Investigation*  
887 105(8): 1095–1108. <http://www.jci.org/articles/view/8574>.
- 888 Remmerie, Anneleen, and Charlotte L. Scott. 2018. "Macrophages and Lipid Metabolism." *Cellular*  
889 *Immunology* 330: 27–42. <https://linkinghub.elsevier.com/retrieve/pii/S0008874918300327>.
- 890 Ruan, Wenjing et al. 2017. "Serum Levels of IGFBP7 Are Elevated during Acute Exacerbation in COPD  
891 Patients." *International Journal of Chronic Obstructive Pulmonary Disease* Volume 12: 1775–80.  
892 [https://www.dovepress.com/serum-levels-of-igfbp7-are-elevated-during-acute-exacerbation-](https://www.dovepress.com/serum-levels-of-igfbp7-are-elevated-during-acute-exacerbation-in-copd-peer-reviewed-article-COPD)  
893 [in-copd-peer-reviewed-article-COPD](https://www.dovepress.com/serum-levels-of-igfbp7-are-elevated-during-acute-exacerbation-in-copd-peer-reviewed-article-COPD).
- 894 Shattuck-Heidorn, Heather et al. 2016. "Energetics and the Immune System: Trade-Offs Associated  
895 with Non-Acute Levels of CRP in Adolescent Gambian Girls." *Evolution, Medicine, and Public*  
896 *Health*: eow034. <https://academic.oup.com/emph/article-lookup/doi/10.1093/emph/eow034>.
- 897 Soeters, Maarten R., and Peter B. Soeters. 2012. "The Evolutionary Benefit of Insulin Resistance."  
898 *Clinical Nutrition* 31(6): 1002–7.  
899 <https://linkinghub.elsevier.com/retrieve/pii/S0261561412001112>.
- 900 Straub, Rainer H. 2014. "Insulin Resistance, Selfish Brain, and Selfish Immune System: An  
901 Evolutionarily Positively Selected Program Used in Chronic Inflammatory Diseases." *Arthritis*  
902 *Research & Therapy* 16(Suppl 2): S4. [http://arthritis-](http://arthritis-research.biomedcentral.com/articles/10.1186/ar4688)  
903 [research.biomedcentral.com/articles/10.1186/ar4688](http://arthritis-research.biomedcentral.com/articles/10.1186/ar4688).
- 904 Teng, Ooiean, Candice Ke En Ang, and Xue Li Guan. 2017. "Macrophage–Bacteria Interactions—A  
905 Lipid-Centric Relationship." *Frontiers in Immunology* 8.  
906 <http://journal.frontiersin.org/article/10.3389/fimmu.2017.01836/full>.
- 907 Warburg, Otto. 1925. "Über Den Stoffwechsel Der Carcinomzelle." *Klinische Wochenschrift* 4(12):  
908 534–36. <http://link.springer.com/10.1007/BF01726151>.
- 909 Zmora, Niv, Stavros Bashiardes, Maayan Levy, and Eran Elinav. 2017. "The Role of the Immune  
910 System in Metabolic Health and Disease." *Cell Metabolism* 25(3): 506–21.  
911 <https://linkinghub.elsevier.com/retrieve/pii/S1550413117300967>.
- 912
- 913



914 **Figure legends**

915

916 **Figure 1. Streptococcal infection increases Impl2 expression in a Hif1 $\alpha$ -dependent manner in**  
917 **activated macrophages**

918 **(A)** Expression of Impl2 mRNA at whole-body level in flies (CrqGal4>GFP) infected with *S.*  
919 *pneumoniae* (S.p. infected) and control flies (Buff. injected) at various time points; results ompared  
920 by unpaired t test with Holm-Sidak method for multiple comparisons. **(B)** Representative confocal  
921 microscopy images of control (left) and infected (right) Impl2-RA>mCherry individuals imaged at 24  
922 hpi, from Z stack of 7 layers, autofluorescence in the green channel was used to visualize the fly's  
923 body (see Figure 1-figure supplement 5 for images in color blind friendly pallete). **(C)** Number of  
924 Impl2-positive macrophages in the thorax of control and infected adult flies (Impl2-RA>mCherry) at  
925 24 hpi; results compared by unpaired t test. **(D)** Confocal microscopy image of infected and  
926 dissected Impl2-RA>mCherry bearing fly stained with anti-NimC1 antibody (green) depicting the  
927 expression of Impl2 in hemocytes, from Z stack of 11 layers. The scale bar represents 10  $\mu$ m. **(E)**  
928 Confocal microscopy image of Impl2-RA>mCherry hemocyte actively interacting with GFP-labeled *S.*  
929 *pneumoniae* (S.p.-GFP) *ex vivo*. The scale bar represents 13  $\mu$ m. **(F)** Expression of Impl2 mRNA (using  
930 primers targeting all transcript variants) in hemocytes isolated from Buff. injected and S.p. infected  
931 flies with macrophage-specific Impl2 knockdown (Impl2<sup>RNAi</sup>), overexpression (Impl2<sup>CDS</sup>) and their  
932 respective controls (TRiP<sup>control</sup>, w<sup>1118</sup>) at 24 hpi (right) and gene expression of Impl2-RA transcript in  
933 hemocytes isolated from Buff. injected and S.p. infected flies with hemocyte-specific Impl2  
934 knockdown (Impl2<sup>RNAi</sup>) and its respective control (TRiP<sup>control</sup>) at 24 hpi (left), documenting the  
935 efficiency of RNAi fly line used in this manuscript. Results compared by 2way ANOVA Tukey's multiple  
936 comparisons test. **(G)** Gene expression of Impl2-RA (left) and all Impl2 transcript variants (right) in  
937 hemocytes isolated from Buff. injected and S.p. infected control (HmlGal4>GFP) flies and flies with  
938 hemocyte-specific Hif1 $\alpha$  knockdown at 24 hpi. Results compared by 2way ANOVA Tukey's multiple

939 comparisons test. (H) Relative amount of selected Impl2 genomic regions (visualized in I) bound by  
940 the transcription factor Hif1 $\alpha$  in Buff. injected and S.p. infected flies. Selected genomic region of S-  
941 adenosylmethionin synthetase was used as a negative control. Results compared by 2way ANOVA  
942 Tukey's multiple comparisons test. (I) *In silico* analysis of hypoxic enhancer activity by 500 bp bins at  
943 the Impl2 locus and visualization of Impl2 transcript variants (Flybase.org). Each black dot plots a  
944 log<sub>2</sub> fold change (y-axis) of the difference in the randomer tag counts mapped to the 500-bp bin  
945 between normoxic and hypoxic conditions. The triangles show the position and negative log<sub>10</sub> p-  
946 value (y-axis) of multiple hypoxic (Hif1 $\alpha$ ), immune (Rel) and stress (HSF) response transcription factor  
947 binding sites. The close up shows distribution and clustering of individual response elements for the  
948 most significant bin. In **A**, **F** and **G**, expression levels normalized against rp49 are reported as fold  
949 change relative to levels of Impl2 (using primers targeting all transcript variants) and Impl2-RA  
950 respectively, in Buff. injected controls, which were arbitrarily set to 1. The individual dots represent  
951 biological replicates with line/bar showing mean  $\pm$  SD, asterisks mark statistically significant  
952 differences (\*p<0.05; \*\*p<0.01; \*\*\*p<0.001). Hif1 $\alpha$ , hypoxia-inducible factor 1  $\alpha$ ; Rel, relish; HSF,  
953 heat shock factor.

954

955 **Figure 1-figure supplement 1. Impl2-RA>mCherry-positive cells display hemocyte morphology and**  
956 **actively phagocytose *Staphylococcus aureus***

957 Representative confocal microscopy image of Impl2-RA>mCherry hemocyte depicting its phagocytic  
958 ability visualized by *S. aureus*-pHrodo (green). The scale bar represents 10  $\mu$ m.

959

960 **Figure 1-figure supplement 2. Gene expression of Impl2 transcript variants in distinct tissues**

961 Gene expression of Impl2-RA (left), Impl2-RB and Impl2-RD (middle) and Impl2-RC (right) transcript  
962 variants in either hemocytes, fat body or thoracic muscles dissected from control and infected

963 Crq>GFP flies at 24 hpi. Expression levels normalized against rp49 are presented as a fold change  
964 relative to levels of ImpL2-RA in hemocytes of Buff. injected control flies, which were arbitrarily set to  
965 1. Individual dots represent biological replicates. Results were compared by unpaired t test with  
966 Holm-Sidak method for multiple comparisons. Values are mean  $\pm$  SD, asterisks mark statistically  
967 significant differences (\* $p$ <0.05; \*\* $p$ <0.01; \*\*\* $p$ <0.001).

968

969 **Figure 1-figure supplement 3. Efficiency of genetic manipulation of Hif1 $\alpha$**

970 Gene expression of Hif1 $\alpha$  in hemocytes of Buff. injected and S.p. infected flies with or without  
971 hemocyte-specific Hif1 $\alpha$  knockdown. Expression levels normalized against rp49 are presented as a  
972 fold change relative to levels of Hif1 $\alpha$  in Buff. injected HmlGal>GFP flies, which were arbitrarily set to  
973 1. Individual dots represent biological replicates. Results compared by 2way ANOVA Tukey's multiple  
974 comparisons test. Values are mean  $\pm$  SD, asterisks mark statistically significant differences (\* $p$ <0.05;  
975 \*\* $p$ <0.01; \*\*\* $p$ <0.001).

976

977 **Figure 1-figure supplement 4. ImpL2-RA regulatory sequence with transcription factor binding sites**

978 500-bp long sequence upstream of ImpL2-RA transcriptional start site (as shown on map) with  
979 marked binding sites for Hif1 $\alpha$ , Rel and HSF1. Hif1 $\alpha$ , hypoxia-inducible factor 1  $\alpha$ ; Rel, relish; HSF1,  
980 heat shock factor 1.

981

982 **Figure 1-figure supplement 5. Copy of Figure 1B and 1D in color blind friendly palette.**

983 **(A, B)** Representative confocal microscopy images of control (left) and infected (right) ImpL2-  
984 RA>mCherry individuals imaged at 24 hpi, from Z stack of 7 layers, autofluorescence in the green  
985 channel was used to visualize the fly's body. **(C)** Confocal microscopy image of infected and dissected

986 ImpL2-RA>mCherry bearing fly stained with anti-NimC1 antibody (green) depicting the expression of  
987 ImpL2 in hemocytes, from Z stack of 11 layers. The scale bar represents 10  $\mu$ m.

988

989 **Figure 2. Macrophage-derived ImpL2 regulates changes in adipose tissue metabolism induced by**  
990 **infection**

991 **(A)** Triglyceride concentration in Buff. injected and S.p. infected flies with macrophage-specific ImpL2  
992 knockdown (ImpL2<sup>RNAi</sup>), overexpression (ImpL2<sup>CDS</sup>) and their respective controls (TRiP<sup>control</sup>, w<sup>1118</sup>) at  
993 whole-body level at 24 hpi. **(B-D)** Average size **(B)** and number **(C)** of lipid droplets (values log10-  
994 transformed) and percentage of area occupied **(D)** in the fat body of Buff. injected and S.p. infected  
995 flies with macrophage-specific ImpL2 knockdown (ImpL2<sup>RNAi</sup>), overexpression (ImpL2<sup>CDS</sup>) and their  
996 respective controls (TRiP<sup>control</sup>, w<sup>1118</sup>) at 24 hpi. **(E)** Representative confocal microscopy images of  
997 dissected fat body of Buff. injected and S.p. infected flies with macrophage-specific ImpL2  
998 knockdown (ImpL2<sup>RNAi</sup>), overexpression (ImpL2<sup>CDS</sup>) and their respective controls (TRiP<sup>control</sup>, w<sup>1118</sup>) at  
999 24 hpi, stained with OilRedO (red), DAPI (cyan) and CellBrite (white). The scale bar represents 20  $\mu$ m.  
1000 **(F)** Relative proportions of different lipid species in the fat body of Buff. injected and S.p. infected  
1001 flies with macrophage-specific ImpL2 knockdown (ImpL2<sup>RNAi</sup>), overexpression (ImpL2<sup>CDS</sup>) and their  
1002 respective controls (TRiP<sup>control</sup>, w<sup>1118</sup>) at 24 hpi. **(G)** Glycogen concentration in Buff. injected and S.p.  
1003 infected flies with -specific ImpL2 knockdown (ImpL2<sup>RNAi</sup>), overexpression (ImpL2<sup>CDS</sup>) and their  
1004 respective controls (TRiP<sup>control</sup>, w<sup>1118</sup>) at whole-body level at 24 hpi. Metabolite concentrations were  
1005 normalized to the amount of proteins in each sample. Values are mean  $\pm$  SD, asterisks mark  
1006 statistically significant differences (\*p<0.05; \*\*p<0.01; \*\*\*p<0.001). Results in **(A-D and G)** were  
1007 compared by 2way ANOVA Tukey's multiple comparisons test. **(B-D)** were quantified from 8 confocal  
1008 microscopy images for each genotype and treatment. Lipidomic analysis in **(F)** was performed in  
1009 three biological replicates for each genotype and treatment. PC, phosphatidylcholine; PE,

1010 phosphatidylethanolamine; TG, triglycerides; DG, diglycerides; PG, phosphatidylglycerol; PI,  
1011 phosphatidylinositol; LysoPC, Lyso-phosphatidylcholine; LysoPE, Lyso-phosphatidylethanolamine.

1012

1013 **Figure 3. Infection-induced autophagy and changes in gene expression in adipose tissue**

1014 **(A)** Representative confocal microscopy images of fat body of control and infected flies with Atg8a-  
1015 mCherry autophagy reporter (Atg8a, red; DAPI, cyan). The scale bar represents 20  $\mu$ m. **(B)** Graphical  
1016 representation of log<sub>2</sub>-fold change in mRNA expression of genes involved in insulin signaling,  
1017 lipoprotein and lipid metabolism, glycogenolysis and autophagy in the fat body of Buff.-injected and  
1018 S.p.-infected flies with macrophage-specific Impl2 knockdown (Impl2<sup>RNAi</sup>), overexpression (Impl2<sup>CDS</sup>)  
1019 and their respective controls (TRiP<sup>control</sup>, w<sup>1118</sup>) at 24 hpi. The first column (Infection) shows the log<sub>2</sub>-  
1020 fold change in mRNA expression in S.p.-infected flies compared to Buff.-injected control flies (average  
1021 change for TRiP<sup>control</sup> and w<sup>1118</sup>). The second to fourth columns represent the log<sub>2</sub>-fold change in  
1022 mRNA expression compared to the corresponding control for knockdown (Impl<sup>RNAi</sup> to TRiP<sup>control</sup>) and  
1023 overexpression (Impl<sup>CDS</sup> to w<sup>1118</sup>) in either uninfected (Buff.) or S.p. infected (S.p.) flies. Foxo,  
1024 forkhead box O; 4EBP, Thor; EIF-4E1, eukaryotic translation initiation factor 4E1; MTP, microsomal  
1025 triacylglycerol transfer protein; apoLPP, apolipoprotein lipase; apoLTP, apolipoprotein lipase transfer particle;  
1026 Bmm, brummer; Lip4, lipase 4; Hsl, hormone sensitive lipase; Glutaryl-CoA deh., Glutaryl-CoA  
1027 dehydrogenase; GlyS, glycogen synthase; GlyP, glycogen phosphorylase; Atg1, autophagy-related  
1028 gene 1; Atg6, autophagy-related gene 6.

1029

1030 **Figure 3-figure supplement 1. Expression levels of genes regulating metabolism in adipose tissue**

1031 Gene expression of *Foxo*, *4EBP*, *EIF4E1*, *Glutaryl-CoA deh.*, *Lip4*, *HSL*, *Bmm*, *GlyS*, *GlyP*, *apoLTP*,  
1032 *apoLPP*, *MTP*, *Atg1*, and *Atg6* genes in adipose tissue of Buff. injected (black bars) and S.p. infected  
1033 (grey bars) flies with macrophage-specific Impl2 knockdown, overexpression and their respective

1034 controls; all genotypes depicted below the x-axis were crossed with *Hml>Gal4; TubGal80<sup>TS</sup>*.  
1035 Expression levels normalized against rp49 are presented as a fold-change relative to the levels in the  
1036 Buff. injected TRiP<sup>control</sup>, which was arbitrarily set to 1. The individual dots represent biological  
1037 replicates. Results were compared by 2way ANOVA Tukey's multiple comparisons test. Bars show  
1038 mean  $\pm$  SD, asterisks mark statistically significant differences (\* $p < 0.05$ ; \*\* $p < 0.01$ ; \*\*\* $p < 0.001$ ).

1039

1040 **Figure 4. Macrophage-derived Impl2 affects Foxo activity in adipose tissue**

1041 Representative confocal microscopy images of Foxo immunolocalization in the fat body of Buff.  
1042 injected and S.p. infected flies with macrophage-specific Impl2 knockdown (Impl2<sup>RNAi</sup>),  
1043 overexpression (Impl2<sup>CDS</sup>) and their respective controls (TRiP<sup>control</sup>, *w<sup>1118</sup>*) at 24 hpi; anti-dFoxo  
1044 antibody, green; DAPI, cyan. Histograms of Foxo cellular localization represent Foxo and DAPI signal  
1045 intensity in sections indicated by a white freehand line. The scale bar represents 20  $\mu$ m.

1046

1047 **Figure 5. Macrophage-derived Impl2 affects adipose tissue insulin sensitivity**

1048 **(A)** Representative confocal images of dissected adipose tissue of control flies (*w<sup>1118</sup>*), flies with  
1049 macrophage-specific Impl2 overexpression (Impl2<sup>CDS</sup>), and flies with macrophage-specific Impl2  
1050 overexpression (Impl2<sup>CDS</sup>) and ubiquitous expression of hypomorphic variant of Foxo (*foxoBG01018*)  
1051 stained by OilRedO (red), CellBrite (white) and DAPI (cyan) at 24 hpi. The scale bar represents 20  $\mu$ m.  
1052 **(B)** Representative confocal images of localization of the PI3K reporter tGPH in adipose tissue of Buff.  
1053 injected and S.p. infected control flies (*w<sup>1118</sup>*) and flies with specific Impl2 overexpression (Impl2<sup>CDS</sup>)  
1054 at 24 hpi. tGPH, green; DAPI, cyan. The scale bar represents 20  $\mu$ m.

1055

1056 **Figure 6. Macrophage-derived ImpL2 increases circulating carbohydrates and lipids to be available**  
1057 **for activated macrophages**

1058 **(A)** Concentrations of circulating glucose, trehalose, glycerides, and free fatty acids in the  
1059 hemolymph of Buff. injected and S.p. infected flies with macrophage-specific ImpL2 knockdown  
1060 (ImpL2<sup>RNAi</sup>), overexpression (ImpL2<sup>CDS</sup>) and their respective controls (TRiP<sup>control</sup>, w<sup>1118</sup>) at 24 hpi. **(B)**  
1061 Concentrations of glucose, trehalose, glycerides, and free fatty acids **(H)** in macrophages of Buff.  
1062 injected and S.p. infected flies with macrophage-specific ImpL2 knockdown (ImpL2<sup>RNAi</sup>),  
1063 overexpression (ImpL2<sup>CDS</sup>), and their respective controls (TRiP<sup>control</sup>, w<sup>1118</sup>) at 24 hpi. **(C)**  
1064 Representative confocal microscopy image of macrophages (Crq>GFP) containing lipid droplets;  
1065 neutral lipids were stained with OilRedO (red). The scale bar represents 10  $\mu$ m. The image represents  
1066 a Z-stack consisting of a maximum projection of 5 layers. **(D)** Proportional occurrence of  
1067 macrophages containing at least one lipid droplet (stained by OilRedO) at 24 hpi, data combined  
1068 from fifty Crq>GFP positive cells. **(E)** Representative confocal microscopy images depicting the ability  
1069 of macrophage (Crq>GFP) to endocytose lipoproteins (human LDL-pHrodo, red). The scale bar  
1070 represents 10  $\mu$ m. **(F)** Number of endocytic events in macrophages of flies, which were injected with  
1071 various concentrations (1x – dose corresponding to physiological concentration, 5x, and 10x) of  
1072 lipoproteins (human LDL-pHrodo). The results are combined from three biological replicates. **(A-B)**  
1073 Metabolite concentrations were normalized to the amount of proteins in each sample. Carbohydrate,  
1074 resp. lipid measurements were performed in eight, resp. four replicates represented by individual  
1075 dots. Results in **(A,B and D)** were compared by 2way ANOVA Tukey's multiple comparisons test and  
1076 in **(F)** one-way ANOVA Tukey's multiple comparisons test. Bars/lines show means  $\pm$  SD, asterisks mark  
1077 statistically significant differences (\*p<0.05; \*\*p<0.01; \*\*\*p<0.001).

1078

1079 **Figure 6-figure supplement 1. Concentration of carbohydrates and lipids in control fly lines**

1080 (A-E) Concentrations of circulating glucose (A), trehalose (B) and glycerides (C) in hemolymph and  
1081 triglycerides (D) and glycogen (E) at a whole body level of Buff. injected and S.p. infected Hml-Gal4  
1082 TubGal80<sup>TS</sup> x TRiP<sup>control</sup>, Hml-Gal4 TubGal80<sup>TS</sup> x w<sup>1118</sup>, Impl2<sup>RNAi</sup> x TRiP<sup>control</sup>, and Impl2<sup>CDS</sup> x w<sup>1118</sup>  
1083 control flies at 24 hpi. Metabolite concentrations were normalized to the amount of proteins in each  
1084 sample. Results were compared by 2way ANOVA Tukey's multiple comparisons test. Bars show  
1085 means ± SD, asterisks mark statistically significant differences (\*p<0.05; \*\*p<0.01; \*\*\*p<0.001).

1086

1087 **Figure 7. Macrophage-derived Impl2 is important for resistance to bacterial infection**

1088 (A, C) Survival rate of *S. pneumoniae* (S.p.) infected and Buff. injected flies with macrophage-specific  
1089 Impl2 knockdown (Impl2<sup>RNAi</sup>) (A), overexpression (Impl2<sup>CDS</sup>) (C) and their respective controls  
1090 (TRiP<sup>control</sup>, w<sup>1118</sup>). Three independent experiments were performed and combined into one survival  
1091 curve; the number of individuals per replicate was at least 500 for each genotype. (B, D) Pathogen  
1092 load in S.p. infected and Buff. injected flies with knockdown (Impl2<sup>RNAi</sup>) (B), overexpression  
1093 (Impl2<sup>CDS</sup>) (D) and their respective controls (TRiP<sup>control</sup>, w<sup>1118</sup>) at 24 and 48 hpi. The individual dots in  
1094 the plot represent the number of bacteria (colony forming units-CFUs) in one fly. The data show  
1095 results combined from three independent biological replicates. (E) Confocal microscopy image  
1096 depicting the ability of a macrophage (Crq>GFP) to phagocytose an invading pathogen (*S. aureus*-  
1097 pHrodo-red). The scale bar represents 10 μm. The image represents a Z-stack consisting of a  
1098 maximum projection of 5 layers. (F) Phagocytic rate calculated for flies with macrophage-specific  
1099 Impl2 knockdown (Impl2<sup>RNAi</sup>), overexpression (Impl2<sup>CDS</sup>), and their respective controls (TRiP<sup>control</sup>,  
1100 w<sup>1118</sup>); each dot in the plot represents the log10-transformed number of phagocytic events per  
1101 macrophage (Crq>GFP); results are combined from three independent experiments. Survival data (A  
1102 and C) were analyzed by Log-rank and Grehan-Breslow Wilcoxon tests, pathogen load (B and D) by  
1103 Mann-Whitney test and phagocytic capability (F) by one-way ANOVA Tukey's multiple comparisons



1104 test. Lines are means  $\pm$  SD, asterisks mark statistically significant differences (\* $p < 0.05$ ; \*\* $p < 0.01$ ;  
1105 \*\*\* $p < 0.001$ ).

1106

1107 Figure 7-figure supplement 1. **Survival of additional control genotypes of *S. pneumoniae* infection.**

1108 Survival rate of *S.p.* infected and Buff. injected flies with macrophage-specific Impl2 knockdown  
1109 (Impl2<sup>RNAi</sup>) (upper graph) and overexpression (Impl2<sup>CDs</sup>) (lower graph) and their respective  
1110 controls (Impl2<sup>RNAi</sup> x TRiP<sup>control</sup>, HmlG4G80 x TRiP<sup>control</sup>, Impl2<sup>CDs</sup> x w<sup>1118</sup> and HmlG4G80 x w<sup>1118</sup>). Three  
1111 independent experiments were performed and combined into one survival curve; the number of  
1112 individuals per replicate was at least 500 for each genotype. Survival data were analyzed by Log-rank  
1113 and Grehan-Breslow Wilcoxon tests.

1114

1115 Figure 7-figure supplement 2. **Expression of antimicrobial peptides in hemocytes**

1116 Gene expression of Drosocin (upper graph), Metchnikowin (middle graph) and Defensin (lower  
1117 graph) in macrophages of flies with macrophage-specific Impl2 knockdown (Impl2<sup>RNAi</sup>),  
1118 overexpression (Impl2<sup>CDs</sup>), and their respective controls (TRiP<sup>control</sup>, w<sup>1118</sup>) at 24 hpi. Expression levels  
1119 normalized against rp49 are reported as fold change relative to levels of Drosocin, Metchnikowin,  
1120 and Defensin, respectively, in Buff. injected TRiP<sup>control</sup>, which were arbitrarily set to 1. The individual  
1121 dots represent biological replicates. Results were compared by 2way ANOVA Tukey's multiple  
1122 comparisons test. Bars show means  $\pm$  SD, asterisks mark statistically significant differences (\* $p < 0.05$ ;  
1123 \*\* $p < 0.01$ ; \*\*\* $p < 0.001$ ).

1124

1125 Figure 8. **Impl2 enhances deleterious effects of chronic infection**

1126 (A, C) Survival rate of *L. monocytogenes* (L.m.) infected and Buff. injected flies with macrophage-  
1127 specific Impl2 overexpression (Impl2<sup>CD5</sup>) (A), knockdown (Impl2<sup>RNAi</sup>) (C), and their respective controls  
1128 (TRiP<sup>control</sup>, w<sup>1118</sup>). Three independent experiments were performed and combined into each survival  
1129 curve; the number of individuals per replicate was at least 500 for each genotype. (B, D) Pathogen  
1130 load of *L. monocytogenes* in flies with macrophage-specific Impl2 overexpression (Impl2<sup>CD5</sup>) (B),  
1131 knockdown (Impl2<sup>RNAi</sup>) (D), (E) and their respective controls (TRiP<sup>control</sup>, w<sup>1118</sup>) shown as either total  
1132 load or intracellular *Listeria* subpopulation at 24 hpi and at 12 days post-infection. The individual dots  
1133 in the plot represent the number of bacteria (colony forming units-CFUs) in one fly. The data show  
1134 results combined from three independent biological replicates. Survival data (A and C) were analyzed  
1135 by Log-rank and Grehan-Breslow Wilcoxon tests and pathogen load (B and D) by Mann-Whitney test.  
1136 Values are mean  $\pm$  SD, asterisks mark statistically significant differences (\*p<0.05; \*\*p<0.01;  
1137 \*\*\*p<0.001).

1138

1139 **Figure 9. IGFBP7, the mammalian homolog of Impl2, is produced in human macrophages in**  
1140 **response to *S. pneumoniae* in vitro**

1141 (A) Confocal microscopy images of PMA-activated control THP-1 cells (left) and PMA-activated THP-1  
1142 cells actively interacting with GFP-labeled *S. pneumoniae* (green) *in vitro* (right). The scale bar  
1143 represents 10  $\mu$ m. The image on the right is a maximum projection of 3 layers. (B) Gene expression of  
1144 IGFBP7, IGFBP3 and IGFBP4 in PMA-activated THP-1 cells 24 hours after exposure to *S. pneumoniae*  
1145 *in vitro*. Expression levels normalized against ACTB are shown as a fold change relative to levels of  
1146 IGFBP7 in controls that were arbitrarily set to 1. Measured data were compared in Graphpad Prism  
1147 using 2way ANOVA Sidak's multiple comparison test. Values are mean  $\pm$  SD, asterisks mark  
1148 statistically significant differences (\*p<0.05; \*\*p<0.01; \*\*\*p<0.001).

1149

1150 **Figure 9. Schematic representation of the proposed model of Impl2 function during infection**

1151 Upon recognition of the bacteria, the macrophages switch to Hif1 $\alpha$ -driven aerobic glycolysis. Hif1 $\alpha$   
1152 also induces the expression of the Impl2-RA isoform by binding to hypoxia response elements in the  
1153 promotor of the *Impl2* gene. Macrophage-derived Impl2 then remotely activates Foxo re-  
1154 localization to the nucleus in the fat body, leading to the expression of metabolic Foxo-target genes.  
1155 Mobilized sources, manifested by hyperlipidemia and hyperglycemia in the hemolymph, are  
1156 subsequently used by activated macrophages. These transient changes in Impl2-regulated  
1157 metabolism are essential for efficient bacterial killing and resistance to infection. However, if  
1158 prolonged, for example during chronic infection, macrophage-derived Impl2 can harm the host by  
1159 potential wasting. Hif1 $\alpha$ , hypoxia-inducible factor 1  $\alpha$ ; HREs, hypoxia response elements; Impl2,  
1160 imaginal morphogenesis protein-late 2; Foxo, forkhead box O.

1161

#### 1162 **Source Data Files**

1163 All source data files are in Graphpad Prism format, which was used for all data processing. The free  
1164 Graphpad viewer is available at [www.graphpad.com](http://www.graphpad.com)

1165

1166 Fig1.pzfx – Source data for Figure 1., Figure 1.-figure supplement 2. and Figure 1.-figure supplement  
1167 3.

1168 Fig2 .pzfx – Source data for Figure 2.

1169 Fig3.pzfx – Source data for Figure 3. and Figure 3.-figure supplement 1.

1170 Fig6.pzfx – Source data for Figure 6.

1171 Fig6suppl1.pzfx – Source data for Figure 6.-figure supplement 1.

1172 Fig7 – Source Data 1.pzfx – Source data for Figure 7.

1173 Fig7suppl1.pzfx – Source data for Figure 7.-figure supplement 1.

1174 Fig6suppl2.pzfx – Source data for Figure 7.-figure supplement 2.

1175 Fig8.pzfx – Source data for Figure 8.

1176 Fig9.pzfx – Source data for Figure 9.

### A ImpL2 expression in whole flies

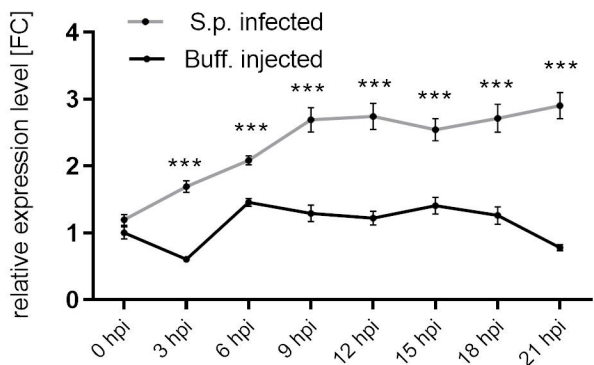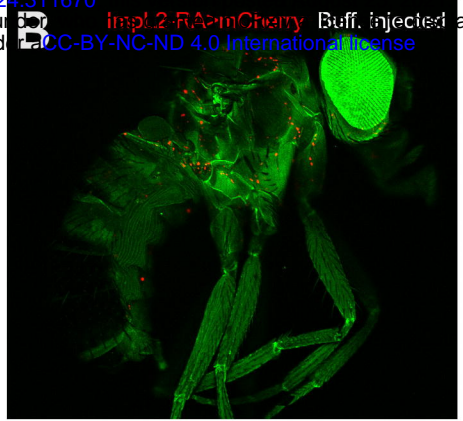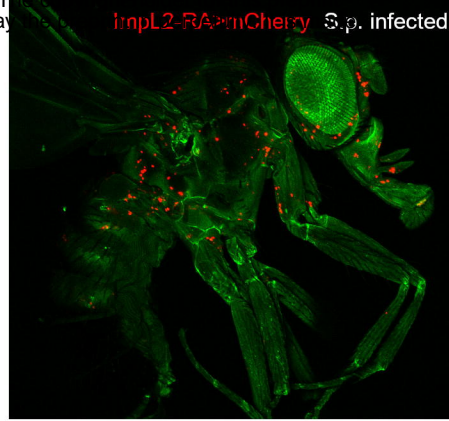

### C Number of ImpL2-positive macrophages

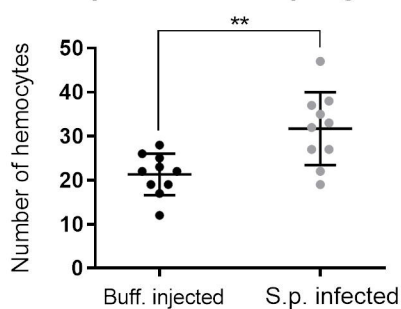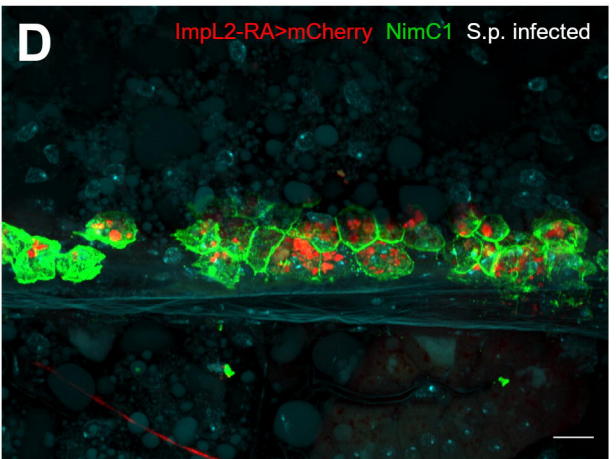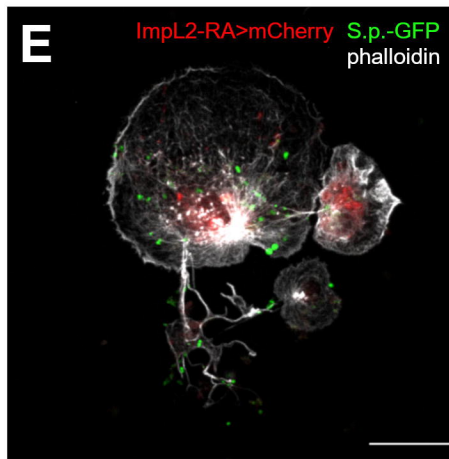

### F Expression of ImpL2 in macrophages

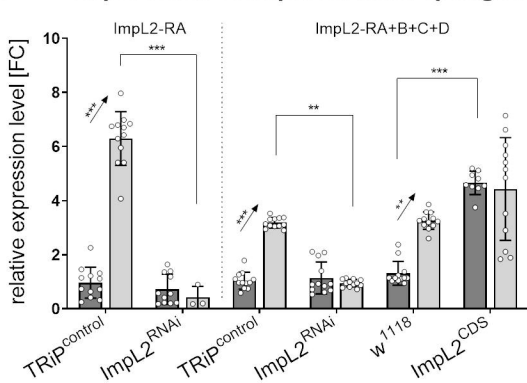

### G ImpL2 expression upon Hif1 $\alpha$ RNAi in macrophages

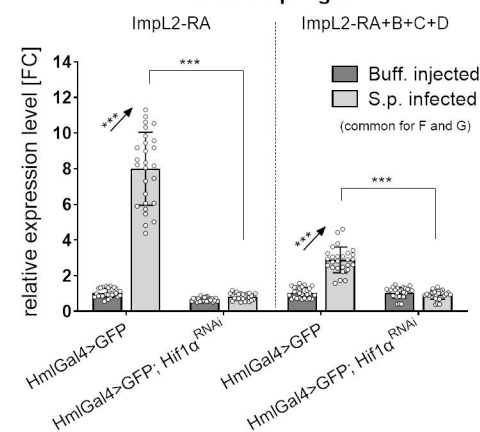

### H Chip-qPCR of Hif1 $\alpha$ -ImpL2

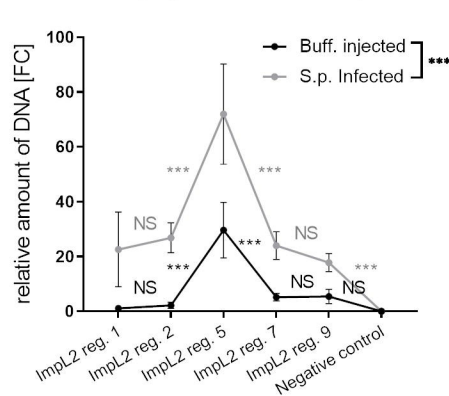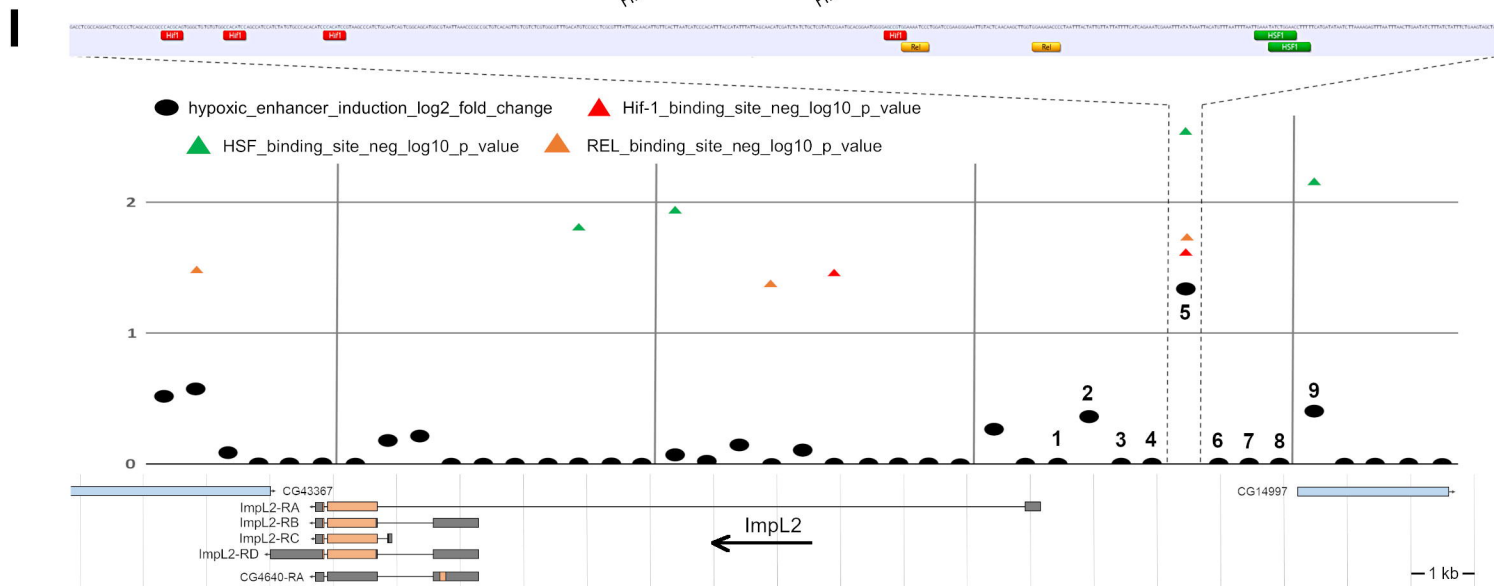



*Hml>Gal4; TubGal80<sup>TS</sup>* crossed to:  
(common for A,B,C,D and G)

*Hml>Gal4; TubGal80<sup>TS</sup>* crossed to:

**F** TRIP control Buff. S.p.

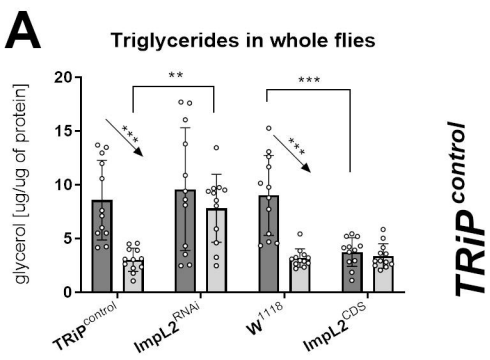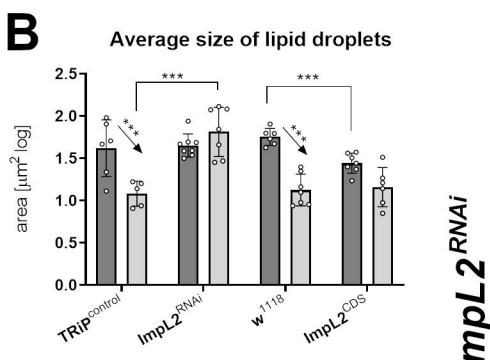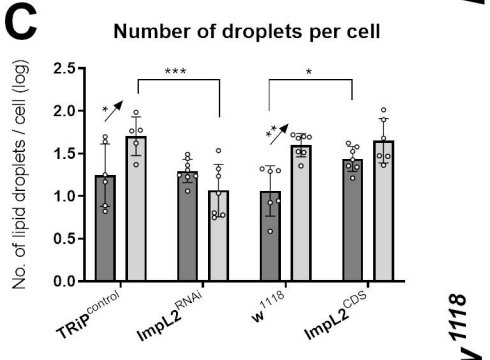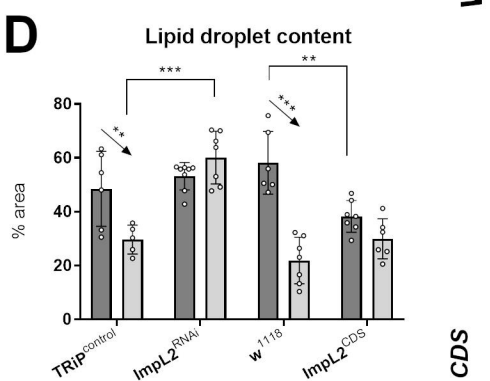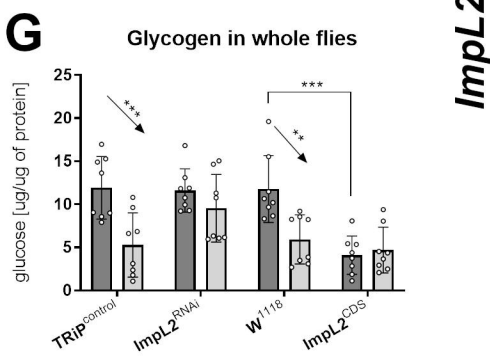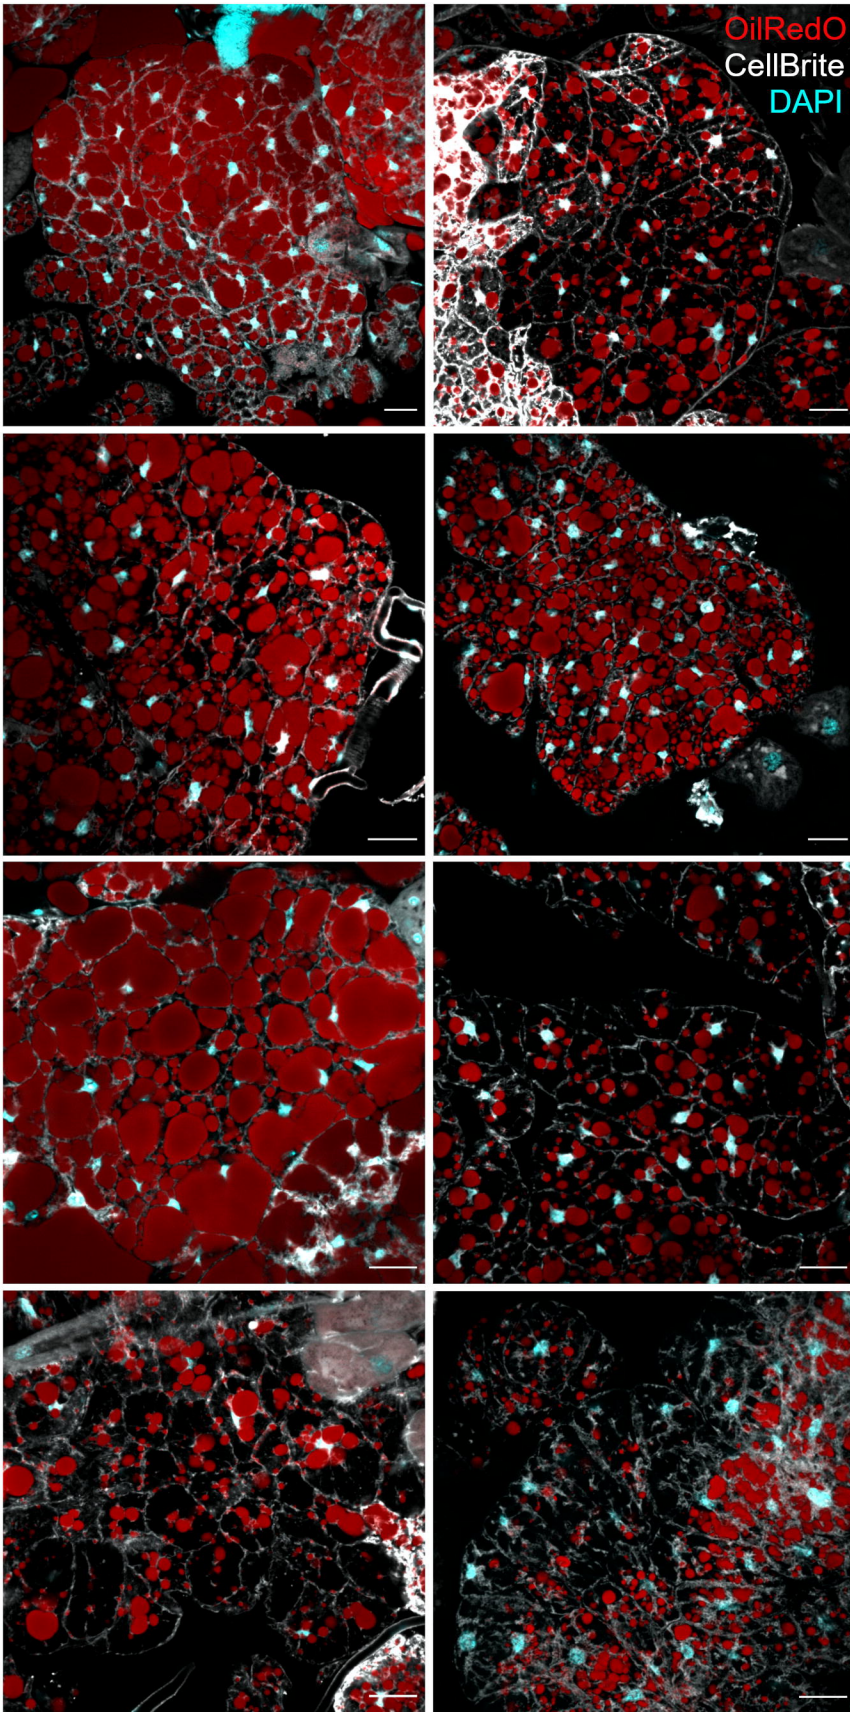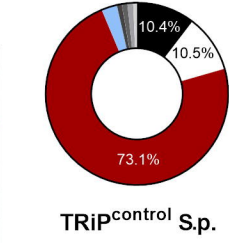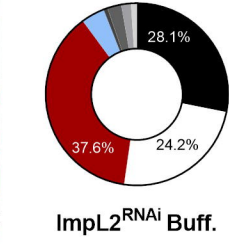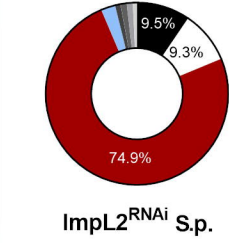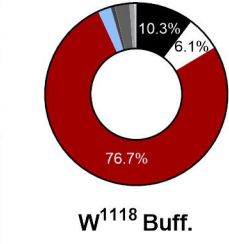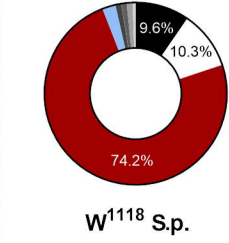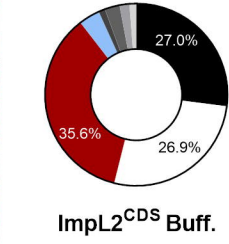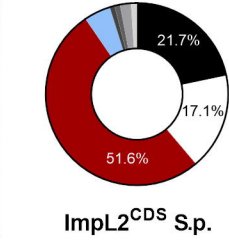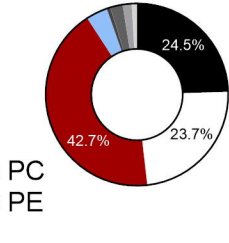

Buff. injected

S.p. infected

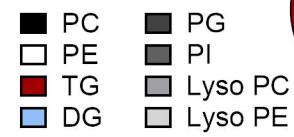

Legend common for A,B,C,D and G:  
 Buff. injected (dark grey bar)  
 S.p. infected (light grey bar)

**A**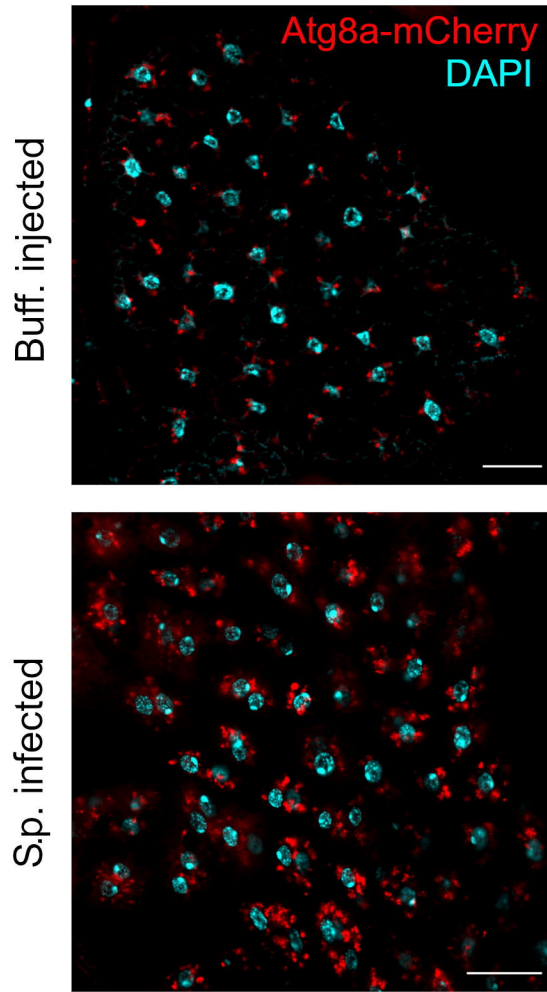**B**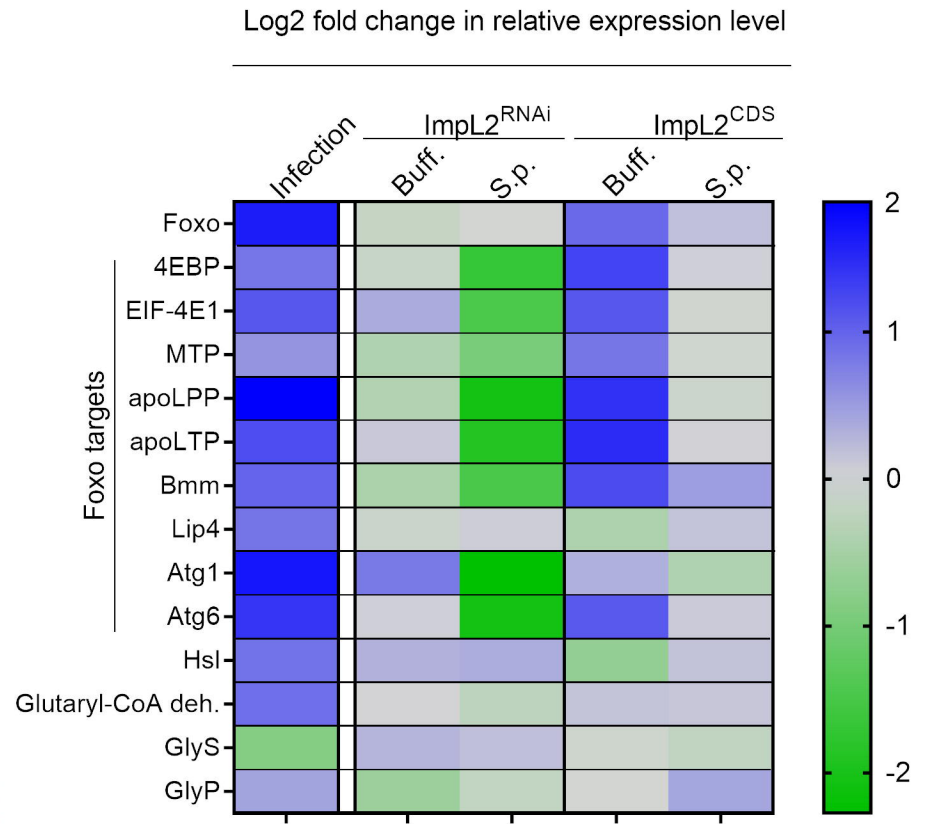



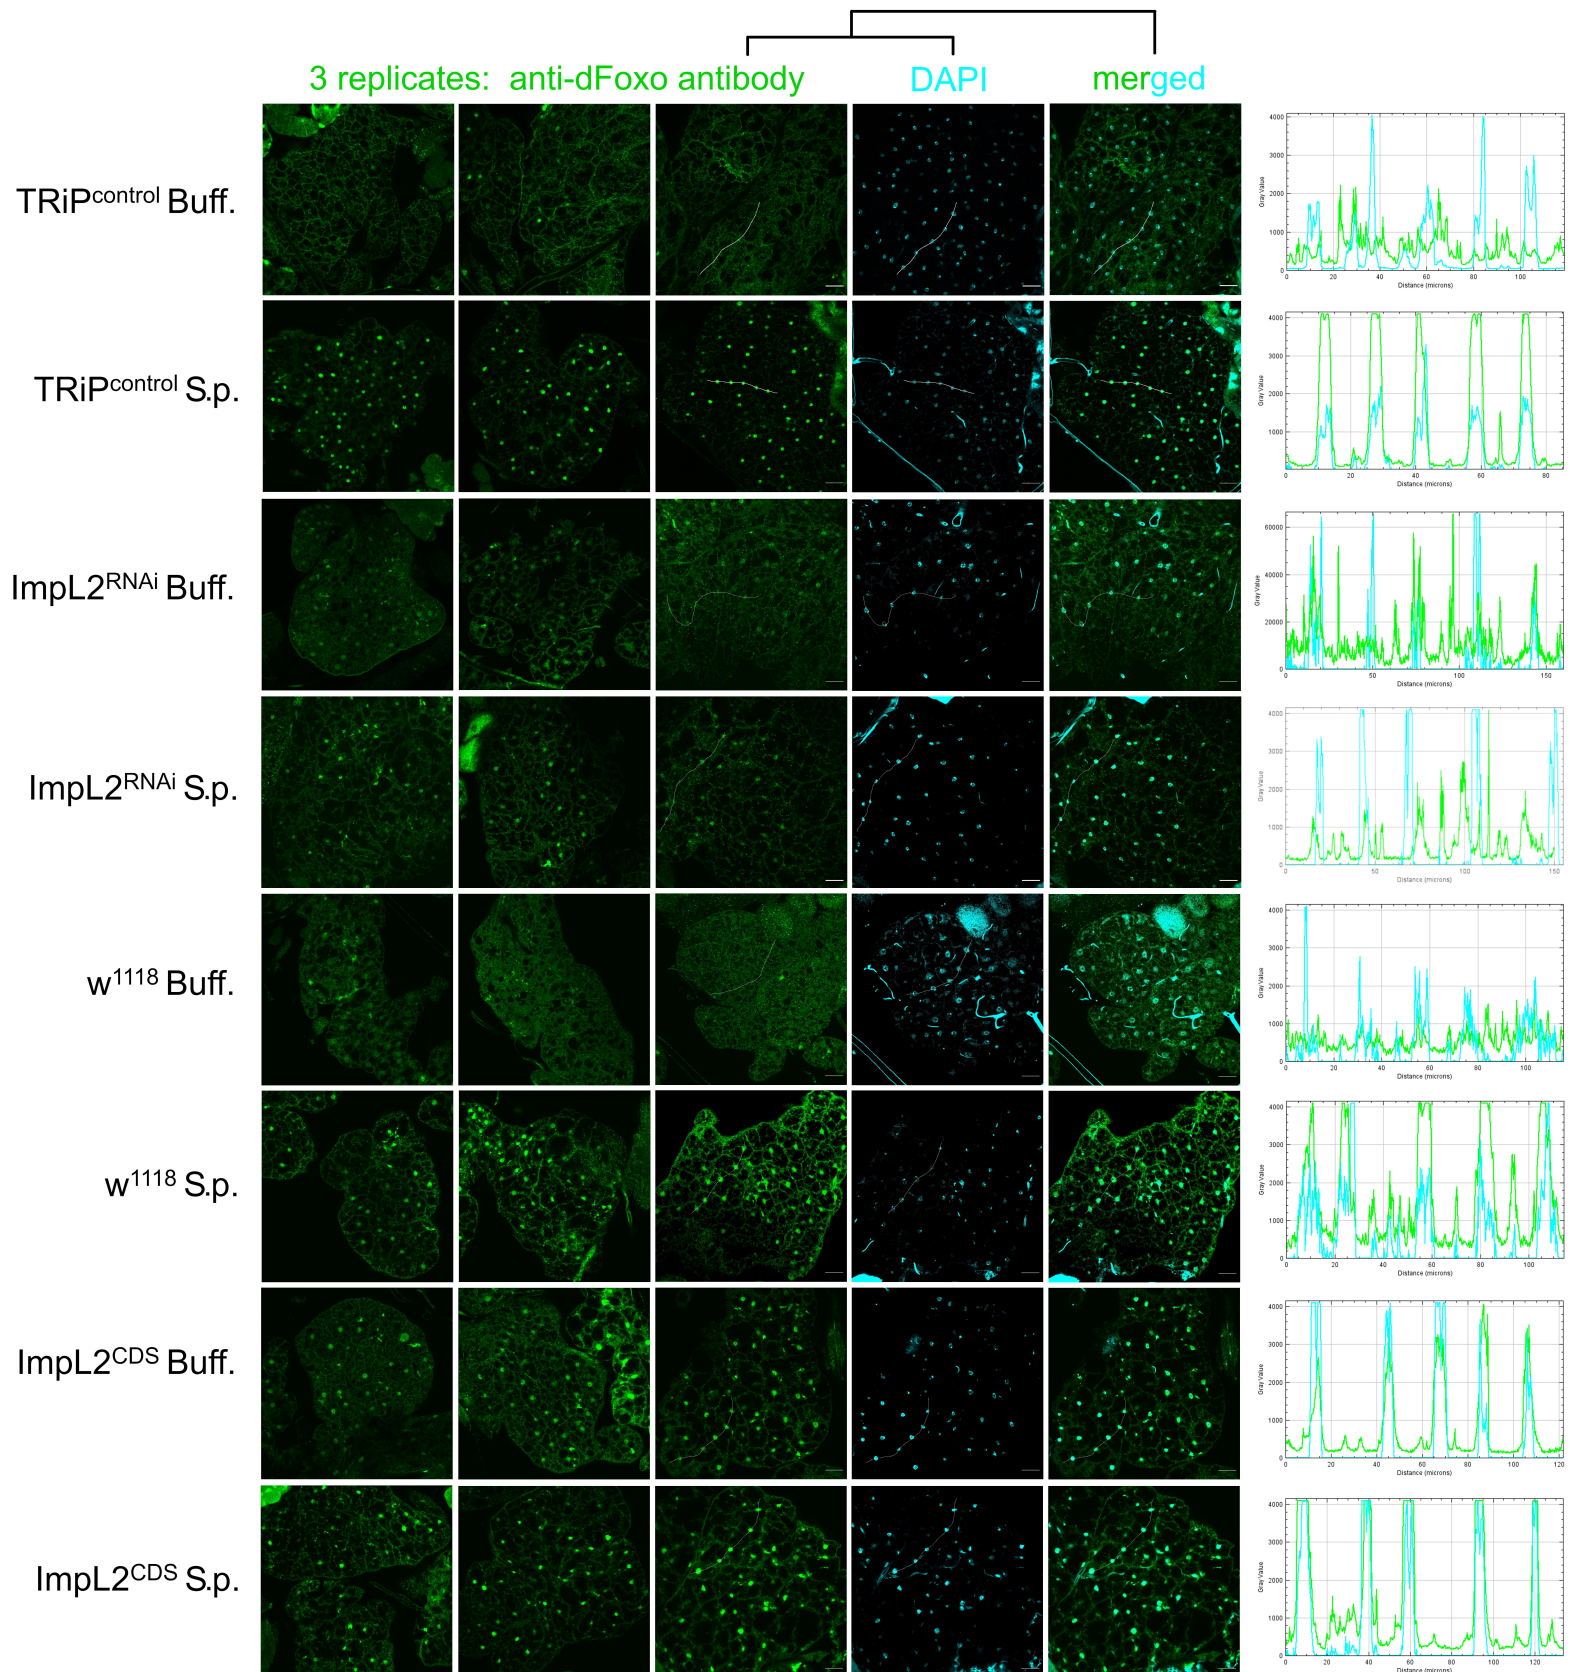



**A** *Hml>Gal4 TubGal80<sup>TS</sup>* crossed to:

*w<sup>1118</sup>*

*ImpL2<sup>CDS</sup>*

*foxo<sup>BG01018</sup> ImpL2<sup>CDS</sup>*

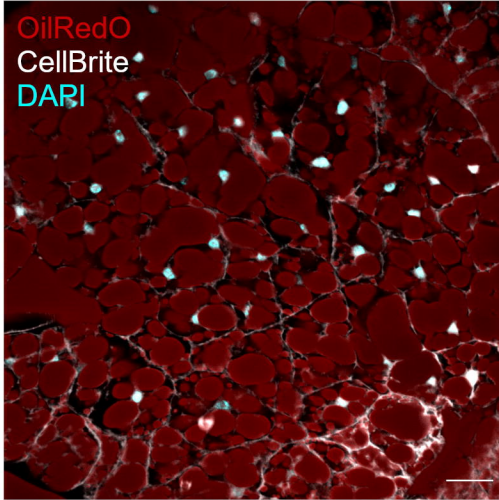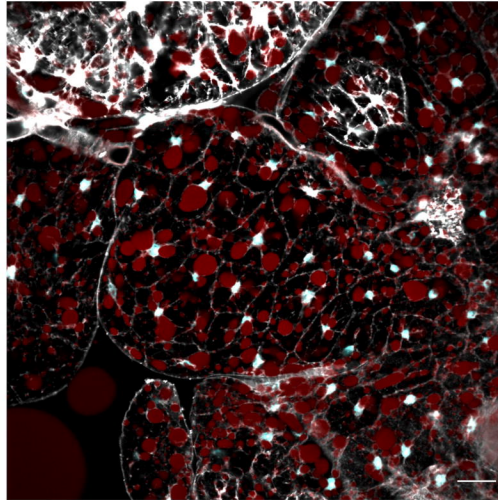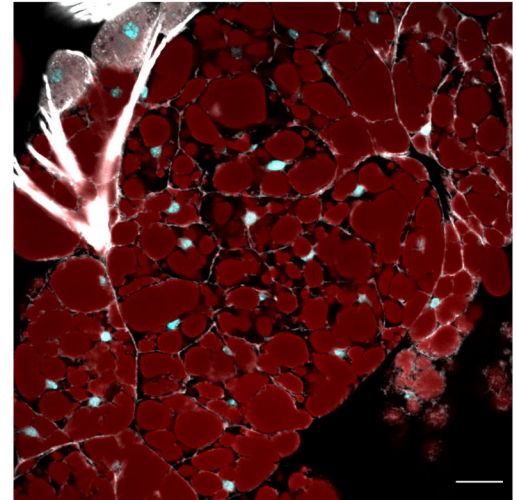

**B**

Buff. injected

*S.p.* infected

*Hml>Gal4 TubGal80<sup>TS</sup>; tGPH-GFP*  
crossed to:

*w<sup>1118</sup>*

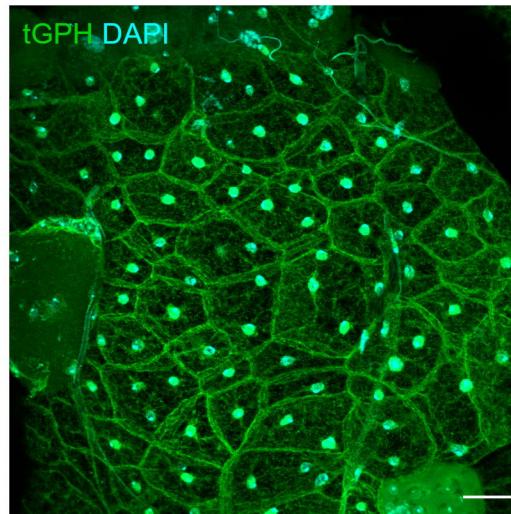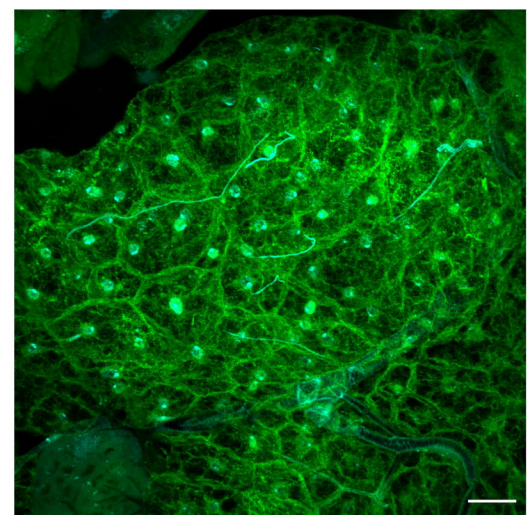

*ImpL2<sup>CDS</sup>*

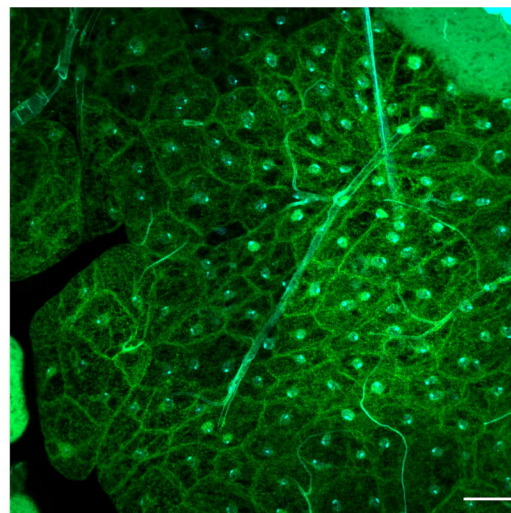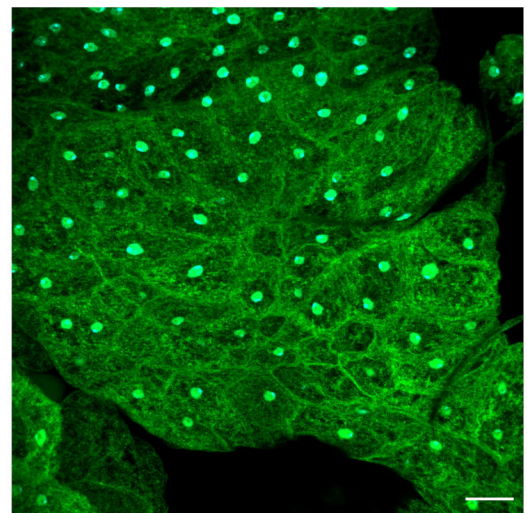



# A HEMOLYMPH

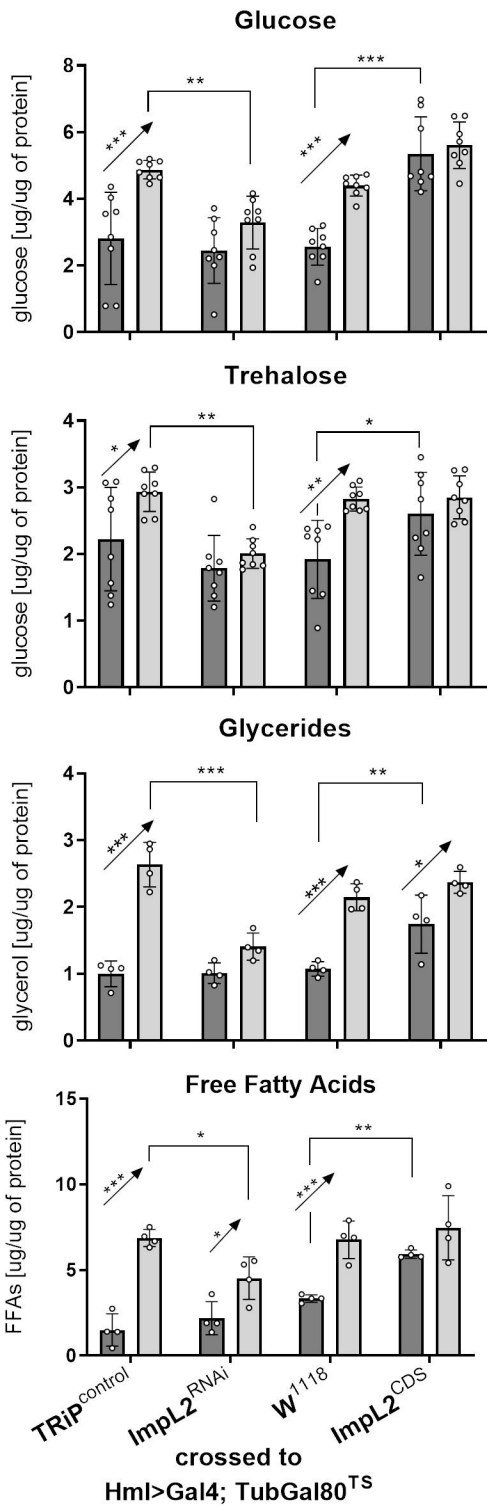

# B HEMOLYMPH

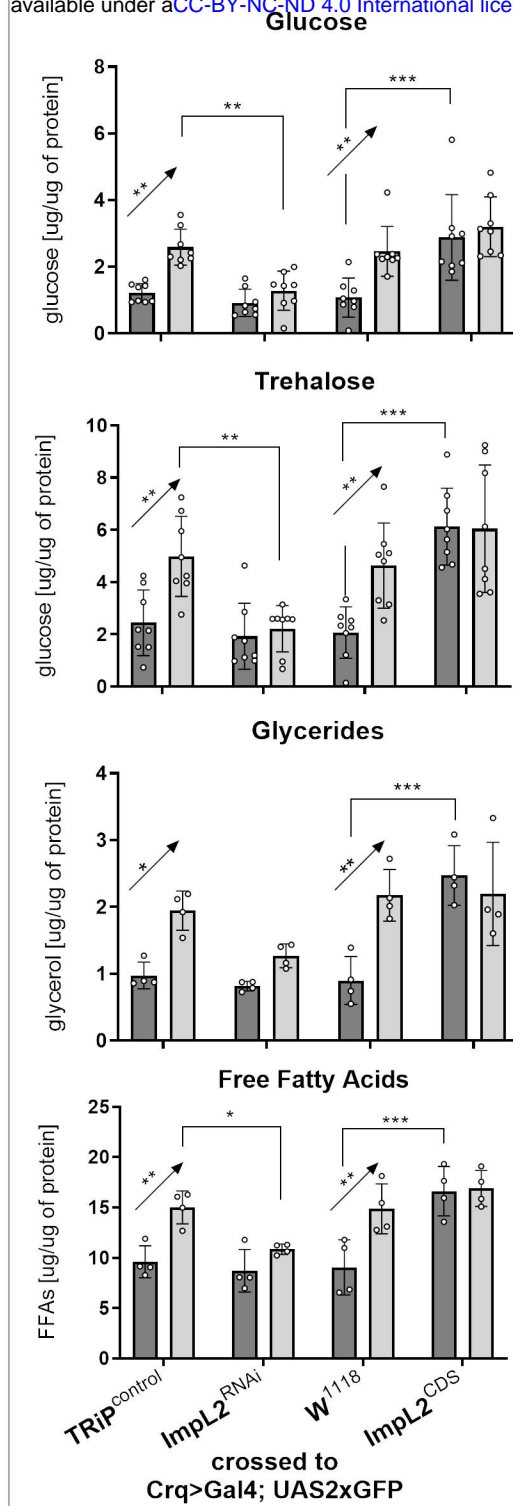

legend for A, B and D:

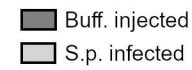

# C

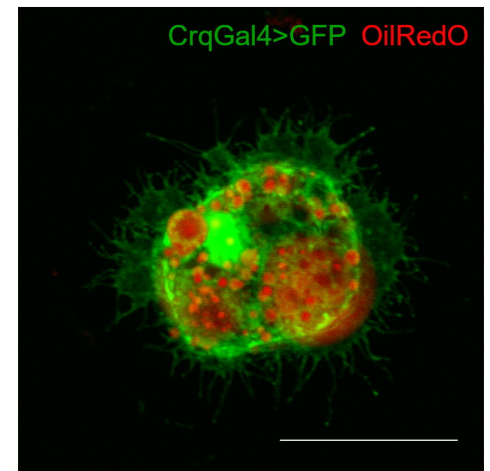

# D

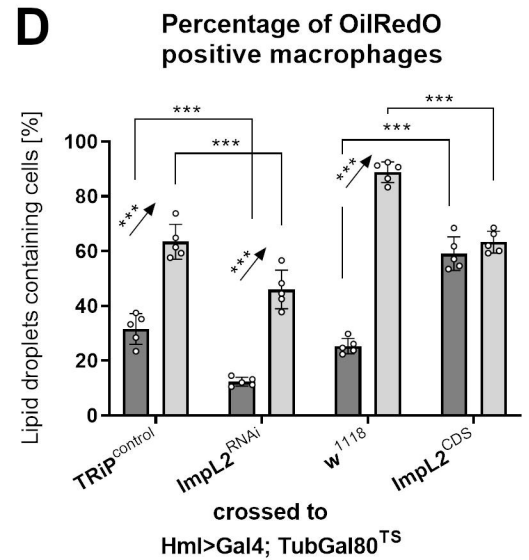

# E

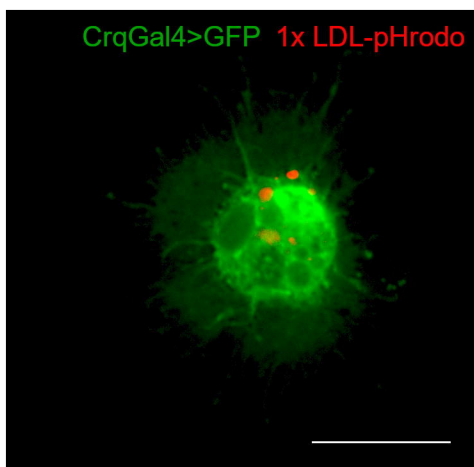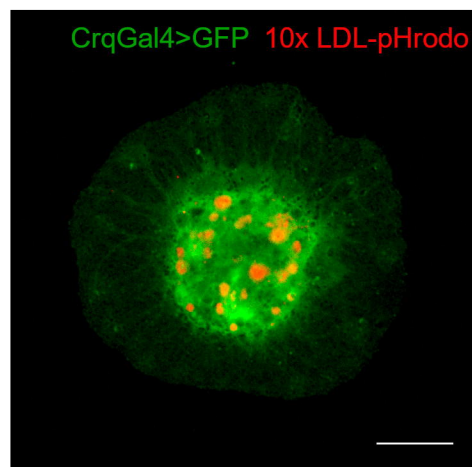

# F

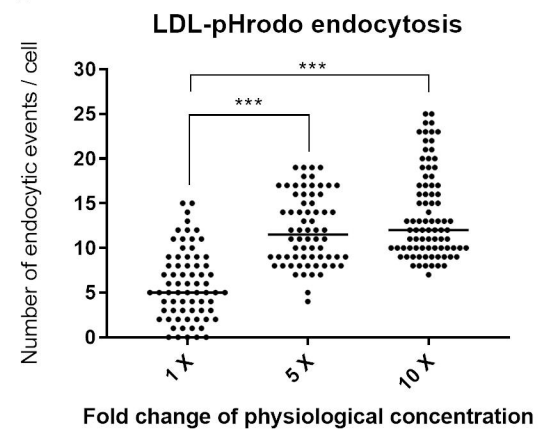

**A**

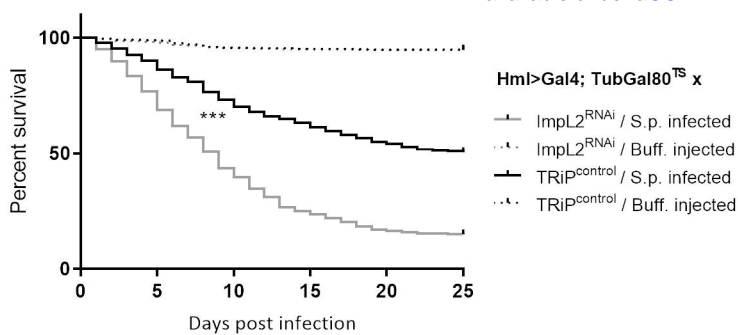

**B**

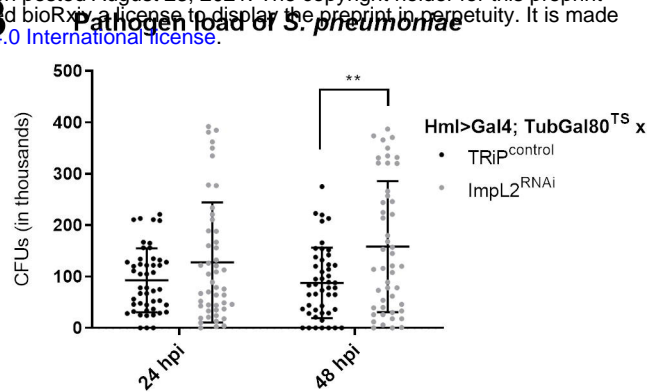

**C**

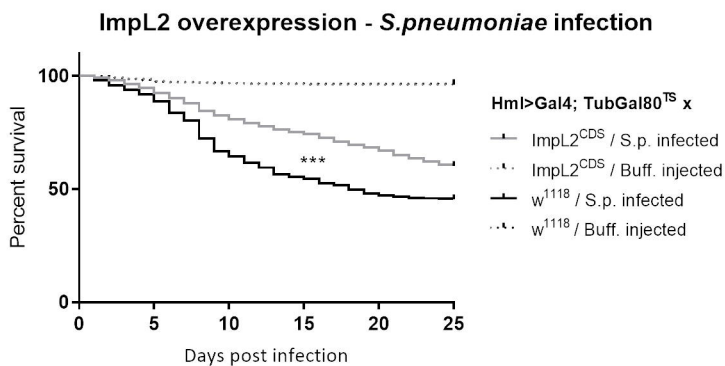

**D**

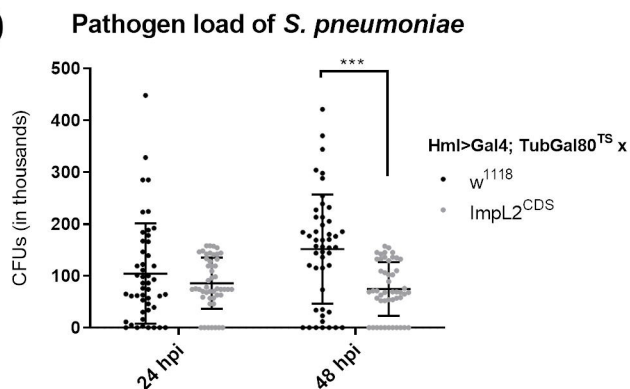

**E**

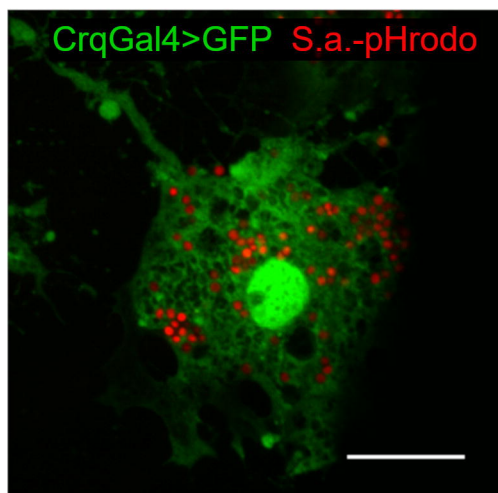

**F**

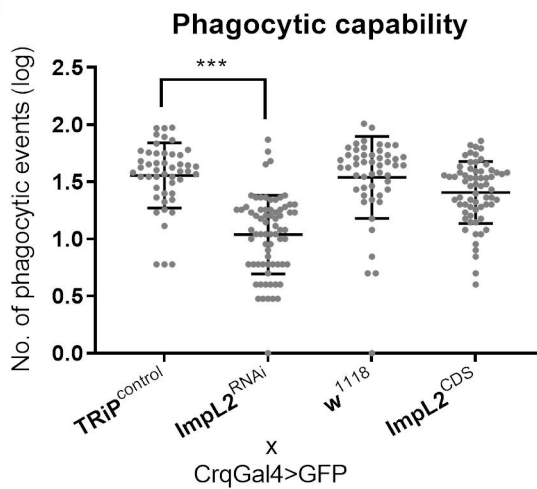

## A ImpL2 overexpression - *L. monocytogenes* infection

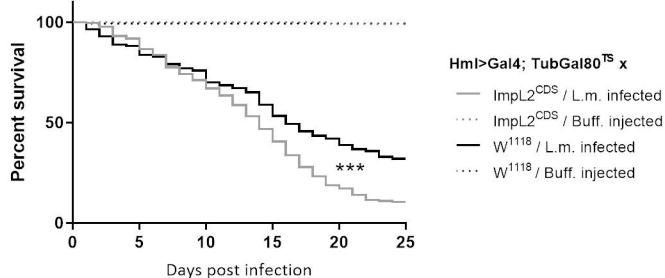

## B Pathogen load of *L. monocytogenes*

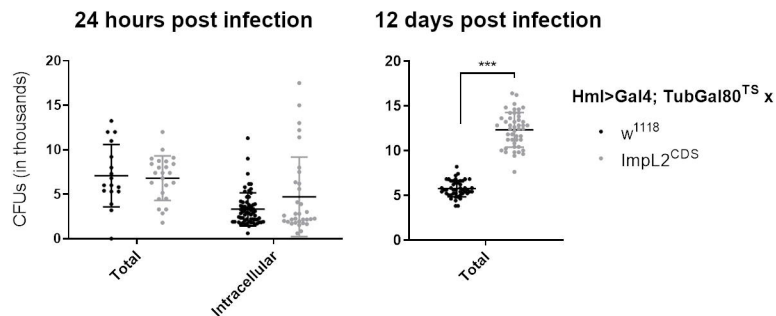

## C ImpL2 knockdown - *L. monocytogenes* infection

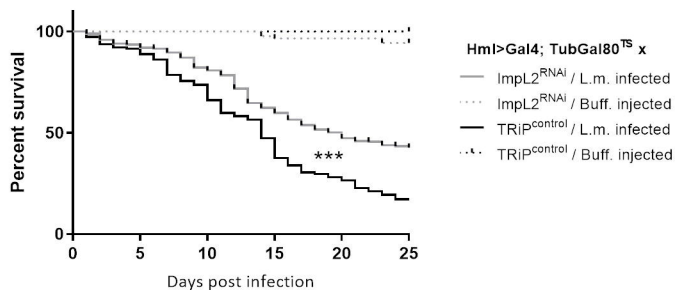

## D Pathogen load of *L. monocytogenes*

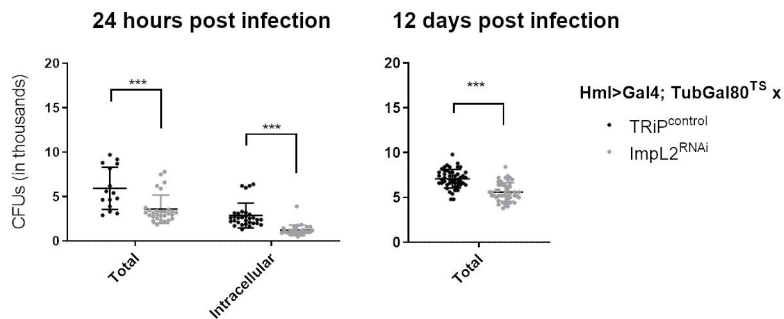

**A**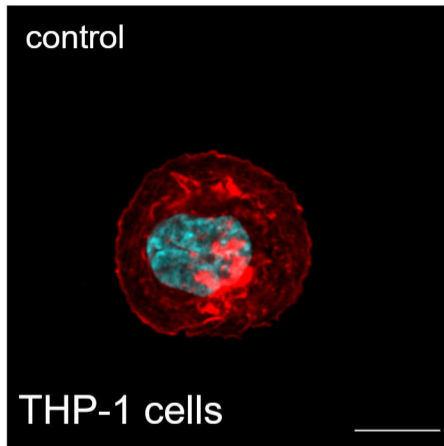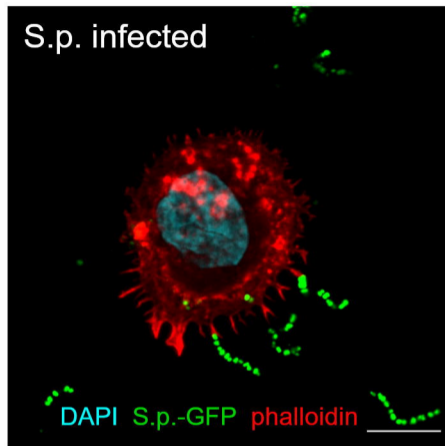**B**

### Expression of IGFBPs in THP-1 cells

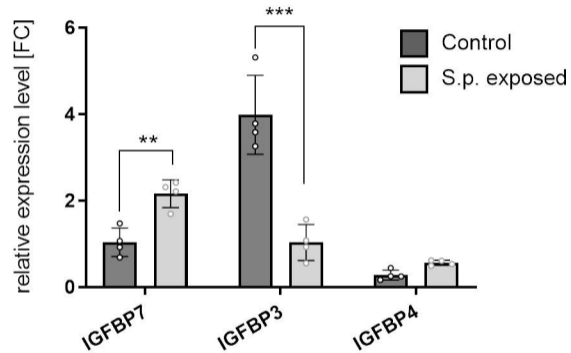

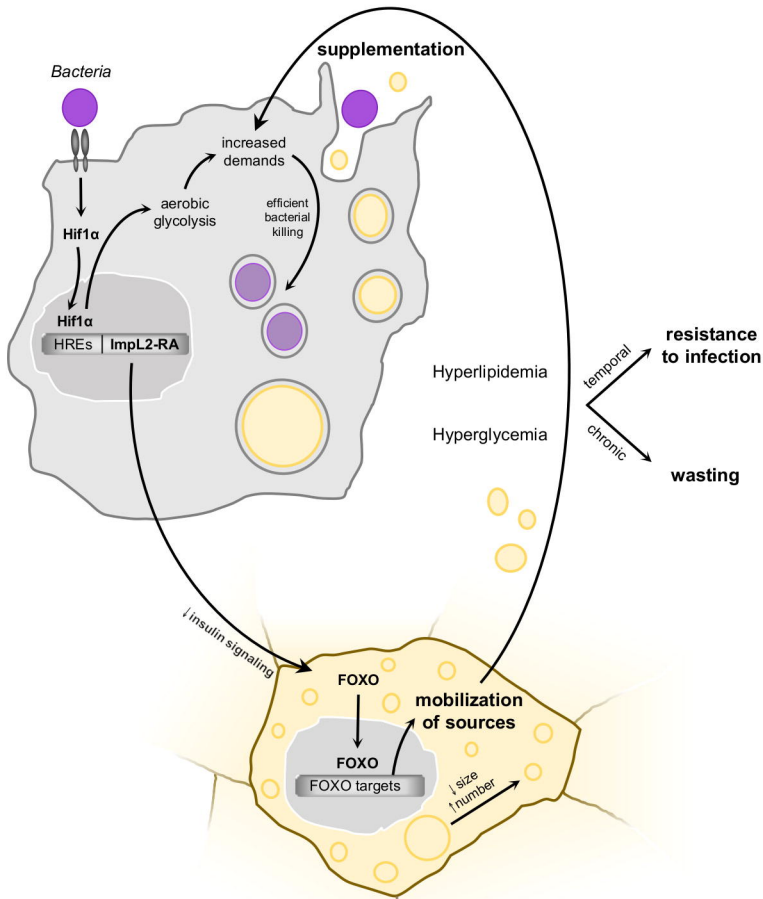

Source: https://www.biorxiv.org/content/biorxiv/early/2021/08/23/2020.09.24.311670.full.pdf
